1 ***In Vivo* Generation of Bone Marrow from Embryonic Stem Cells in Interspecies Chimeras**

2

3 Bingqiang Wen<sup>1</sup>, Guolun Wang<sup>1</sup>, Enhong Li<sup>1</sup>, Olena A. Kolesnichenko<sup>1</sup>, Zhaowei Tu<sup>2</sup>, Senad  
4 Divanovic<sup>3,4</sup>, Tanya V. Kalin<sup>4,5</sup> and Vladimir V. Kalinichenko<sup>1,4,5,6\*</sup>

5

6 <sup>1</sup>*Center for Lung Regenerative Medicine, Perinatal Institute, Cincinnati Children's Hospital*  
7 *Medical Center, Cincinnati, OH 45229, USA.*

8 <sup>2</sup>*Division of Experimental Hematology and Cancer Biology, Cincinnati Children's Hospital*  
9 *Medical Center, Cincinnati, OH 45229, USA.*

10 <sup>3</sup>*Division of Immunobiology, Cincinnati Children's Hospital Medical Center, Cincinnati, OH*  
11 *45229, USA.*

12 <sup>4</sup>*Department of Pediatrics, College of Medicine of the University of Cincinnati, Cincinnati, OH*  
13 *45229, USA.*

14 <sup>5</sup>*Division of Pulmonary Biology, Cincinnati Children's Hospital Medical Center, Cincinnati, OH*  
15 *45229, USA.*

16 <sup>6</sup>*Division of Developmental Biology, Cincinnati Children's Hospital Medical Center, Cincinnati,*  
17 *OH 45229, USA.*

18

19 **\*Correspondence to:** Vladimir V. Kalinichenko, Email: [Vladimir.Kalinichenko@cchmc.org](mailto:Vladimir.Kalinichenko@cchmc.org)

20 Center for Lung Regenerative Medicine, Cincinnati Children's Hospital Medical Center, 3333  
21 Burnet Avenue, Cincinnati, OH 45229, USA.

22

23 **Short Title:** ESCs generate bone marrow in interspecies chimeras

24

25 **Total count (characters with spaces):** 34,741

26

1 **KEY POINTS**

- 2 - We used blastocyst complementation to simultaneously produce all bone marrow  
3 hematopoietic cell lineages from mouse ESCs in a rat.  
4 - ESC-derived cells from mouse-rat chimeras were fully functional and exhibited normal  
5 gene expression signatures and cell surface markers.  
6

1 **SUMMARY**

2 Generation of bone marrow (BM) from embryonic stem cells (ESCs) or induced pluripotent stem  
3 cells (iPSCs) promises to accelerate the development of future cell therapies for life-threatening  
4 disorders. However, such approach is limited by technical challenges to produce a mixture of  
5 functional BM progenitor cells able to replace all hematopoietic cell lineages. Herein, we used  
6 blastocyst complementation to simultaneously produce all BM hematopoietic cell lineages from  
7 mouse ESCs in a rat. Based on FACS analysis and single-cell RNA sequencing, mouse ESCs  
8 differentiated into hematopoietic progenitor cells and multiple hematopoietic cell types that were  
9 indistinguishable from normal mouse BM cells based on gene expression signatures and cell  
10 surface markers. Transplantation of ESC-derived BM cells from mouse-rat chimeras rescued  
11 lethally-irradiated syngeneic mice and resulted in long-term contribution of donor cells to  
12 hematopoietic cell lineages. Altogether, a fully functional bone marrow was generated from  
13 mouse ESCs using rat embryos as “bioreactors”.

14

15 **Abstract word count:** 148

16

1

## 2 **INTRODUCTION**

3 The bone marrow (BM) is a remarkably complex organ consisting of multiple mesenchymal,  
4 immune, endothelial, and neuronal cell types which together comprise a highly specialized  
5 microenvironment required to support life-long blood regeneration or hematopoiesis (1-5).  
6 Hematopoiesis occurs in a stepwise manner and is initiated by a heterogeneous, multipotent,  
7 population of hematopoietic stem cells (HSCs), located at the apex of the hematopoietic  
8 differentiation tree. Long-term HSCs (LT-HSCs) remain quiescent to maintain their  
9 undifferentiated state within the bone marrow niche. When necessary, LT-HSCs can either  
10 undergo differentiation or self-renewal, to maintain the HSC pool. Conversely, short-term HSCs  
11 (ST-HSCs) are restricted in their self-renewal capacity and primed for differentiation into  
12 multipotent progenitors (MPPs), initiating the process of blood cell development. MPPs further  
13 differentiate into common myeloid progenitors (CMPs), lymphoid-primed multipotent progenitors  
14 (LMPPs) and common lymphoid progenitors (CLPs) that become increasingly lineage restricted  
15 with subsequent cell divisions, ultimately yielding all mature blood cell types (6). The  
16 complexities of the hematopoietic system have been studied extensively *in vitro*, utilizing paired-  
17 daughter and colony forming unit (CFU) assays (4, 5). Fluorescence-activated cell sorting  
18 (FACS) has allowed for precise isolation and characterization of HSCs and progenitor  
19 populations based on cell surface markers. Classically, the most biologically relevant way to test  
20 HSC function remains to be through serial transplantation and hematopoietic reconstitution of  
21 irradiated recipient mice (4, 5, 7). Recent advances in single cell RNA sequencing (scRNAseq)  
22 have made it possible to further explore heterogeneity of the bone marrow niche (2, 3), and  
23 identify gene expression signatures of hematopoietic progenitor cells as they differentiate into  
24 mature blood cell types (1, 8).

25         Generation of functional bone marrow from embryonic stem cells (ESCs) or induced  
26 pluripotent stem cells (iPSCs) will provide new therapeutic opportunities for hematologic and

1 autoimmune disorders. However, this approach is limited by technical challenges to produce  
2 functional HSCs or the mixture of hematopoietic progenitors capable of replacing all mature  
3 blood cell types after cell transplantation. HSC-like cells have been generated from mouse and  
4 human ESCs and iPSCs using *in vitro* differentiation protocols (9-15). Likewise, ESCs and  
5 iPSCs have been used to produce myeloid and lymphoid progenitor cells as well as  
6 differentiated hematopoietic cells, including neutrophils, monocytes, erythroid cells, T and B  
7 lymphocytes (15-21). When transplanted into irradiated animals, ESC/iPSC-derived  
8 hematopoietic progenitor cells undergo differentiation and engraft into the bone marrow niche,  
9 providing an important source of renewal and regeneration for various blood cell lineages (4, 5,  
10 14). While ESC/iPSC-derived hematopoietic cells often express appropriate cell markers, gene  
11 expression and functional studies indicate significant differences between ESC/iPSC-derived  
12 cells and endogenous cells that have undergone normal morphogenesis in the bone marrow (14,  
13 22, 23).

14 *In vivo* differentiation of ESCs into multiple cell lineages can be achieved using  
15 blastocyst complementation, in which donor ESCs are injected into blastocysts of recipient  
16 animals to create chimeras. Fluorescently labeled ESCs undergo differentiation in recipient  
17 embryos that serve as “biological reactors” by providing growth factors, hormones and cellular  
18 niches to support ESC differentiation in the embryo. In mouse and rat apancreatic *Pdx1*<sup>-/-</sup>  
19 embryos, donor ESCs formed an entire pancreas in which both exocrine and endocrine cells  
20 were almost entirely derived from ESCs or iPSCs (24, 25). Mouse ESC/iPSC-derived  $\beta$ -cells  
21 from mouse-rat chimeras were fully differentiated and successfully rescued syngeneic diabetic  
22 mice (25). ESCs generated pancreatic cell lineages in apancreatic pigs (26), kidney in *Sall1*<sup>-/-</sup>  
23 deficient rats (27), endothelial cells in *Flk1*<sup>-/-</sup> mice (28), lymphocytes in immunodeficient mice (29)  
24 and neuronal progenitors in mice with forebrain-specific overexpression of diphtheria toxin (30).  
25 Recently, mouse ESCs were used to generate lung and thyroid tissues in embryos deficient for  
26 *Fgf10*, *Nkx2-1*, *Fgfr2* or  *$\beta$ -catenin* (31-33). Using blastocyst complementation, mouse ESCs

1 effectively produced hematopoietic cells in mice deficient for *Kit* or *Ftk1* (28, 34). ESC-derived  
2 endothelial progenitor cells from mouse-rat chimeras were indistinguishable from endogenous  
3 endothelial progenitor cells based on gene expression signatures and functional properties (35).  
4 While all these studies support the effectiveness of blastocyst complementation for  
5 differentiation of multiple cell types from ESCs/iPSCs *in vivo*, generation of functional bone  
6 marrow from ESCs in interspecies chimeras has not yet been achieved.

7         Herein, we used blastocyst complementation to produce mouse bone marrow in a rat.  
8 ESC-derived cells from multiple hematopoietic cell lineages were indistinguishable from normal  
9 mouse hematopoietic BM cells based on gene expression signatures and cell surface markers.  
10 Transplantation of ESC-derived BM cells into lethally-irradiated syngeneic mice prevented  
11 mortality and resulted in a long-term contribution to BM and mature blood cell types. Our data  
12 demonstrate that interspecies chimeras can be used as “bioreactors” for *in vivo* differentiation  
13 and functional studies of ESC-derived hematopoietic progenitor cells.

14

1

## 2 **METHODS**

**Ethics and data sharing statement.** Bone marrow single cell RNA-seq datasets were uploaded to the Gene Expression Omnibus (GEO) database (accession number GSE184940) and made available to other investigators for purposes of replicating the procedures or reproducing the results. All animal studies were reviewed and approved by the Institutional Animal Care and Use Committee of the Cincinnati Children's Research Foundation.

3

4 **Mice, rats and generation of mouse-rat and mouse-mouse chimeras through blastocyst**  
5 **complementation.** C57BL/6 mice were purchased from Jackson Lab. Interspecies mouse-rat  
6 chimeras were generated using blastocyst complementation as described (35, 36). Briefly,  
7 blastocysts from SD rats were obtained at embryonic day 4.5 (E4.5), injected with fifteen GFP-  
8 labeled mouse ESC cells (ESC-GFP, C57BL/6 background) (32, 37) and transferred into  
9 pseudo pregnant SD rat females. Mouse-mouse chimeras were generated by complementing  
10 CD1 blastocysts with fifteen mouse ESC-GFP cells. For FACS analysis and bone marrow  
11 transplantation, BM cells were collected from chimeric pups that were harvested between  
12 postnatal day 4 (P4) and P10. For single cell RNA sequencing, BM cells were prepared from  
13 P10 chimeric pups. To perform BM transplantation, BM cells from 2 tibias and 2 fibulas of  
14 mouse-rat chimeras were FACS-sorted for GFP<sup>+</sup> cells. 500,000 of GFP<sup>+</sup> BM cells from 5-9  
15 mouse-rat chimeras were intravenously (i.v.) injected into irradiated C57BL/6 male mice (6-8  
16 weeks of age) via the tail vein. Whole-body irradiation (11.75 Gy) was performed 3 hours before  
17 BM transplant. Mice were harvested after 8 days or 5 months after BM transplantation. Tissue  
18 dissection, processing and preparation of single cell suspensions were carried out as described  
19 (38-42). Blood analysis was performed in animal facility of Cincinnati Children's Hospital  
20 Research Foundation.

21

1 **Single Cell RNAseq analysis of ESC-derived bone marrow cells.** Bone marrow cells from  
2 three P10 mouse-rat chimeras or three P10 mouse-mouse (control) chimeras were FACS-  
3 sorted for GFP and the *lineage* (Lin) marker. To enrich for hematopoietic progenitor cells, 90%  
4 of GFP<sup>+</sup>Lin<sup>-</sup> cells were combined with 10% of GFP<sup>+</sup>Lin<sup>+</sup> cells. The cell mixture was used for  
5 single cell RNA sequencing analysis based on the 10X Chromium platform  
6 (<https://research.cchmc.org/pbqe/lunggens/mainportal.html>). RNA-seq datasets were uploaded  
7 to the GEO database (accession number GSE184940). Read alignments, quality controls and  
8 false discovery rates were described previously (43, 44). Identification of cell clusters and  
9 quantification of cluster-specific gene expression in BM scRNAseq datasets was performed as  
10 described (1, 32, 35). To assess the transcriptomic similarity of ESC-derived cells from mouse-  
11 rat and mouse-mouse BM, the scRNAseq datasets were normalized with *SCTransform* and  
12 then integrated utilizing the canonical correlation analysis (CCA). In the integrated scRNAseq  
13 datasets, the *SelectIntegrationFeatures* in Seurat package (version 4.0.0 in R 4.0 statistical  
14 environment) was used to identify anchors for integration. The *RunPCA* function was used for  
15 Principal component analysis (PCA) of scRNAseq datasets, and the *PCElbowPlot* function was  
16 used to calculate the standard deviations of the principal components (PCs). PCs with standard  
17 deviation > 3.5 were chosen as input parameters for non-linear UMAP clustering analysis. Next,  
18 the *FindNeighbors* function was used to compute the k.param nearest neighbors, and BM cell  
19 clusters were identified by a shared nearest neighbor (SNN) modularity optimization clustering  
20 algorithm implemented in the *FindClusters* function with resolution set at 0.4 (32, 35, 43).

21  
22 **FACS Analysis.** FACS analysis was performed using cells obtained from the bone marrow and  
23 blood. Antibodies for FACS analysis are listed in Suppl. Table S1. Immunostaining of cell  
24 suspensions were performed as described (45, 46). Identification of hematopoietic cell types  
25 based on multiple cell surface markers is described in (47-51). Stained cells were analyzed  
26 using a five-laser FACSAria II (BD Biosciences) (37, 52).



1

2 **Statistical Analysis.** Statistical significance was determined using one-way ANOVA and  
3 Student's t-test. Multiple means were compared using one-way analysis of variance with the  
4 post-hoc Tukey test.  $P \leq 0.05$  was considered statistically significant. For datasets with  $n < 5$ ,  
5 non-parametric Mann-Whitney U test was used to determine statistical significance. Data were  
6 presented as mean  $\pm$  standard error of mean (SEM).

7

8

## 1 RESULTS

### 2 Generation of bone marrow from pluripotent embryonic stem cells in interspecies

### 3 mouse-rat chimeras. To determine whether mouse ESCs can differentiate into multiple

4 hematopoietic cell lineages in the bone marrow of a rat, blastocyst complementation was

5 performed by injecting GFP-labeled mouse C57BL/6 ESCs (ESC-GFP) into rat SD blastocysts

6 to create interspecies mouse-rat chimeras. Chimeric embryos were transferred into surrogate

7 female rats for subsequent development *in utero* (Fig. 1A). While mouse-rat chimeras were

8 viable, they were smaller than age-matched rats (Fig. 1B). Consistent with the presence of

9 mouse ESC-derived cells (black) in the skin tissue (35), mixed black and white pigmentation

10 distinguished the mouse-rat chimeras from juvenile rats (Fig. 1B). The average body weight of

11 mouse-rat chimeras was smaller than rats, but larger than mice of similar age (Fig. 1C). ESC-

12 derived cells were abundant in femur and tibia bones of the chimeras as evidenced by GFP

13 fluorescence (Fig. 1D). FACS analysis of BM cells obtained from juvenile mouse-rat chimeras

14 revealed that the percentage of ESC-derived cells was 15-50% (Fig. 1E-F). Thus, ESCs

15 contribute to the bone marrow of mouse-rat chimeras.

16 To identify ESC-derived hematopoietic stem cells (HSCs), we used GFP fluorescence

17 and mouse-specific antibodies recognizing multiple cell surface antigens (Fig. 1E and Suppl. Fig.

18 S1A-B). First, ESC-derived GFP<sup>+</sup> BM cells were subdivided into *lineage-positive* (Lin<sup>+</sup>) and

19 *lineage-negative* subpopulations (Lin<sup>-</sup>) (Fig. 1E and Suppl. Fig. S1A-B). The percentage of

20 ESC-derived Lin<sup>-</sup> cells in the bone marrow of mouse-rat chimeras was similar to the percentage

21 of Lin<sup>-</sup> cells in the bone marrow of age-matched C57BL/6 mice (Fig. 1E and 1G). Next, we used

22 Sca1 and CD117 (c-KIT) antibodies to identify Lin<sup>-</sup>Sca1<sup>+</sup>c-KIT<sup>+</sup> cells (LSKs) (Fig. 1E). The

23 percentage of LSKs was higher in the bone marrow of mouse-rat chimeras compared to the

24 control (Fig. 1G). Based on cell surface expression of CD150 and CD48, the percentage of LT-

25 HSCs among LSKs were also higher in mouse-rat chimeras (Fig. 1E and 1H). The percentage

1 of ST-HSCs was unchanged (Fig. 1H). Thus, mouse ESCs are capable of differentiating into  
2 hematopoietic progenitor cells in the bone marrow of mouse-rat chimeras.

3

4 **Single cell RNA sequencing identifies multiple subpopulations of ESC-derived**  
5 **hematopoietic cells in the bone marrow of mouse-rat chimeras.** To identify ESC-derived  
6 cells in the bone marrow, single cell RNAseq (the 10X Chromium platform) of FACS-sorted  
7 GFP<sup>+</sup> BM cells was performed. Mouse ESC-derived cells from P10 mouse-rat chimeras were  
8 compared to ESC-derived cells from P10 mouse-mouse (control) chimeras, the latter of which  
9 were produced by complementing mouse blastocysts with mouse ESCs from the same ESC-  
10 GFP cell line. Based on GFP fluorescence, contribution of ESCs to BM cells in both chimeras  
11 was similar (Suppl. Fig. S2A-B). To enrich for hematopoietic progenitor cells, 90% of FACS-  
12 sorted GFP<sup>+</sup>Lin<sup>-</sup> cells were mixed with 10% of GFP<sup>+</sup>Lin<sup>+</sup> cells prior to single cell RNA  
13 sequencing. BM cells from 3 animals per group were combined prior to FACS sorting. Based on  
14 published gene expression signatures of mouse BM cells (1), 11,326 cells from 14 major cell  
15 subtypes were identified: 5308 cells from control mouse-mouse chimeras and 6018 cells from  
16 mouse-rat chimeras (Fig. 2A). These include lymphoid, erythroid, myeloid and neutrophil  
17 progenitors, Pro-B, Pre-B, B and T lymphocytes, megakaryocytes, dendritic cells, neutrophils,  
18 basophils/eosinophils, monocytes and lymphoid-primed multipotent progenitor cells (LMPPs)  
19 (Fig. 2A and Suppl. Fig. S3A). Combined analysis of BM cells from mouse-rat and mouse-  
20 mouse chimeras demonstrated similar distributions of hematopoietic cell lineages derived from  
21 common myeloid progenitor (CMP) and common lymphoid progenitor (CLP) (Fig. 2A-B),  
22 indicating identical cell types in mouse-rat and control chimeras. For selected genes, we used  
23 violin plots to confirm cell specificity and expression levels of *Ptprc* (*Cd45*), *Pclaf*, *Vpreb1*, *Tmpo*,  
24 *Ebf1*, *Ms4a4b*, *Vamp5*, *Elof1*, *Elane*, *Ms4a2*, *Siglech*, *Ngp*, *Clec4d*, *Ctss* and *Ftl1-ps1* in the  
25 combined dataset (Suppl. Fig. S4). Markers of endothelial cells, adipocytes, osteocytes and  
26 neuronal cells were undetectable in BM cell suspensions from both chimeras (Suppl. Fig. S3B).

1 Percentages CLP-derived lymphoid progenitors, Pro-B, Pre-B, and B cells were lower in mouse-  
2 rat chimeras compared to the control (Fig. 2C). In contrast, percentages of CMP-derived  
3 erythroid, myeloid and neutrophil progenitors, dendritic cells, and basophils/eosinophils were  
4 higher (Fig. 2C). Monocytes and neutrophils were similar, whereas megakaryocytes were  
5 decreased in the bone marrow of mouse-rat chimeras (Fig. 2C). The percentage of lymphoid-  
6 primed multipotent progenitors (LMPPs) in mouse-rat chimeras was increased compared to the  
7 control (Fig. 2B-C). Hematopoietic stem cells, identified by co-expression of *Kit*, *Ly6a(Sca1)* and  
8 *Flt3* mRNAs (4, 5), clustered together with myeloid and erythroid progenitors (Suppl. Fig. S5A-  
9 B). The number of ESC-derived HSCs was higher in BM of mouse-rat chimeras compared to  
10 the control (Suppl. Fig. S5C), findings consistent with FACS analysis (Fig. 1H). Only 6 out of  
11 6018 bone marrow cells (0.1%) in mouse-rat chimeras contained both mouse and rat mRNA  
12 transcripts (Suppl. Tables S2 and S3), indicating that the fusion of mouse and rat BM cells is  
13 rare. Thus, although the cellular composition of ESC-derived hematopoietic BM cells was similar  
14 in mouse-rat and mouse-mouse chimeras, mouse-rat bone marrow was enriched in HSCs,  
15 LMPPs and CMP-derived erythroid, myeloid and neutrophil progenitors.

16

17 **Single cell RNA sequencing identifies close similarities in gene expression signatures**  
18 **between ESC-derived hematopoietic cells in mouse-rat and mouse-mouse chimeras.**

19 Comparison of gene expression signatures between mouse-rat and mouse-mouse chimeras  
20 revealed significant similarities among ESC-derived hematopoietic cell types. Lymphoid  
21 progenitors and pro-B cells isolated from mouse-rat and control chimeras expressed *Ncl*, *Mif*,  
22 *Rcsd1* and *Tspan13*, whereas pre-B cells expressed *Hmgb2*, *Tcf3* and *Pgls* (Fig. 3A). *Cd79a*  
23 and *CD79b* transcripts were detected in B cells of mouse-rat and control chimeras, whereas  
24 *Cd3g* and *Klrd1* were restricted to T cells (Fig. 3A). Based on the correlation analysis, gene  
25 expression profiles of all lymphoid cell types were similar between mouse-rat and control  
26 chimeras (Fig. 3B). Likewise, gene expression signatures of myeloid, erythroid and neutrophil

1 progenitors and their derivatives in the bone marrow were similar in both experimental groups  
2 (Fig. 4A-B). Furthermore, single cell RNAseq identified close similarities in gene expression  
3 signatures of ESC-derived HSCs and LMPPs in both chimeras (Suppl. Figs. S5D and S6). Thus,  
4 gene expression signatures of ESC-derived hematopoietic cells were similar in mouse-rat and  
5 control mouse-mouse chimeras.

6

7 **Transplantation of ESC-derived bone marrow cells from interspecies mouse-rat chimeras**  
8 **rescues lethally-irradiated syngeneic mice.** To test functional properties of mouse BM  
9 hematopoietic progenitor cells derived through a rat, cells were FACS-sorted for GFP from the  
10 bone marrow of juvenile mouse-rat chimeras and transferred into the tail vein of syngeneic  
11 C57BL/6 adult mice that received the lethal dose of whole-body gamma-irradiation three hours  
12 prior to the bone marrow transplant (Fig. 5A). Consistent with published studies (4, 5, 14), all  
13 mice without bone marrow transplant died between 9 and 12 days after irradiation (Fig. 5B). In  
14 contrast, all 20 mice transplanted with GFP<sup>+</sup> BM cells from mouse-rat chimeras survived after  
15 lethal irradiation (Fig. 5B-C). Blood analysis of mice harvested 8 days after irradiation showed  
16 significant decreases in white blood cells (WBC), red blood cells (RBC), platelets (PLT),  
17 hemoglobin (Hb) as well as numbers of granulocytes, monocytes and lymphocytes (Fig. 6A-B  
18 and Suppl. Figs. S7 and S8). Transplantation of ESC-derived BM cells from mouse-rat chimeras  
19 increased WBC and the numbers of granulocytes, monocytes and lymphocytes in the peripheral  
20 blood at day 8 (Fig. 6A-B and Suppl. Figs. S7 and S8). Contribution of ESC-derived BM cells to  
21 granulocytes, monocytes and B cells was higher compared to erythroid and T cells (Fig. 6C and  
22 Suppl. Fig. S9). At 5 months after BM transplantation, ESC-derived cells completely restored  
23 blood cell numbers, PLT and Hb in lethally irradiated mice (Fig. 6A-B and Suppl. Figs. S7 and  
24 S8). Long-term contributions of ESC-derived BM cells to all hematopoietic cell lineages in the  
25 peripheral blood were between 49% and 96% (Fig. 6D and Suppl. Fig. S9). Thus,

1 transplantation of ESC-derived bone marrow cells from mouse-rat chimeras prevented mortality  
2 and restored hematopoietic blood lineages in lethally irradiated syngeneic mice.

3

4 **Transplantation of ESC-derived bone marrow cells from interspecies mouse-rat chimeras**  
5 **resulted in the long-term contribution of donor cells to hematopoietic progenitor cells.**

6 Based on FACS analysis of irradiated mice at day 8, whole-body irradiation decreased the  
7 number of hematopoietic progenitor cells in the bone marrow, including LSKs, ST-HSCs and  
8 LT-HSCs (Fig. 7A-B and Suppl. Fig. S10). Transplantation of ESC-derived BM cells significantly  
9 increased LSKs but did not affect the numbers of ST-HSCs and LT-HSCs in irradiated mice (Fig.  
10 7A-B and Suppl. Fig. S10). Contribution of ESC-derived BM cells to Lin<sup>-</sup> and LSK cell subsets  
11 was high, whereas ESC contribution to ST-HSCs and LT-HSCs at day 8 was low (Fig. 7D and  
12 Suppl. Fig. S11). At 5 months after BM transplantation, percentages of LSKs, ST-HSCs and LT-  
13 HSCs in the bone marrow were significantly increased (Fig. 7A-B and Suppl. Fig. S10). Long-  
14 term contribution of ESC-derived BM cells to LSKs, ST-HSCs and LT-HSCs was between 92%  
15 and 95% (Fig. 7E and Suppl. Fig. S11). Altogether, transplantation of ESC-derived bone marrow  
16 cells from mouse-rat chimeras resulted in efficient, long-term contribution of donor cells to the  
17 bone marrow and blood of lethally irradiated mice.

18

1

## 2 **DISCUSSION**

3 Recent single cell RNA sequencing studies identified remarkable diversity of hematopoietic cell  
4 types in the bone marrow (1). Generation of functional bone marrow cells from pluripotent ESCs  
5 or iPSCs in a dish or in organoids represents a formidable challenge (4, 5). In the present study,  
6 we used blastocyst complementation to generate a diversity of hematopoietic cell types from  
7 mouse ESCs in rat embryos. Interspecies mouse-rat chimeras were viable and contained  
8 approximately 25% of ESC-derived mouse cells in the bone marrow. It is possible that  
9 inactivation of genes critical for hematopoiesis in rat embryos prior to blastocyst  
10 complementation can improve the integration of mouse ESCs into the bone marrow of mouse-  
11 rat chimeras. This approach was supported by recent studies with mouse-mouse chimeras, in  
12 which ESCs contributed to more than 90% of hematopoietic cells in mice deficient for either *Kit*  
13 or *Flk1* (28, 34). While ESCs contributed to all hematopoietic cell lineages in interspecies bone  
14 marrow, the percentage of lymphoid progenitors was lower, whereas the percentages of  
15 myeloid progenitor cells and HSCs were higher in mouse-rat chimeras compared to control  
16 mouse-mouse chimeras. Since both chimeras were produced by complementing blastocysts  
17 with mouse ESCs from the same ESC-GFP cell line, it is unlikely that these changes are  
18 dependent on donor ESCs. It is possible that the observed differences in BM cellular  
19 composition between mouse-rat and mouse-mouse chimeras are due to interactions of donor  
20 ESCs with the host embryo. Structural and functional differences between hormones, growth  
21 factors and their receptors in rats and mice can contribute to the efficiency or timing of  
22 differentiation of mouse ESCs into hematopoietic cell lineages in BM of chimeras.

23 Despite mosaicism in interspecies bone marrow, mouse ESC-derived cells from multiple  
24 hematopoietic cell lineages were highly differentiated and indistinguishable from the normal  
25 mouse bone marrow cells based on gene expression signatures and cell surface proteins.  
26 Consistent with functional competency of ESC-derived bone marrow cells, transplantation of

1 these cells into lethally-irradiated syngeneic mice prevented mortality and resulted in long-term  
2 contribution of ESC-derived cells to all hematopoietic cell lineages in the bone marrow and  
3 peripheral blood. Our results are consistent with recent studies demonstrating the ability of  
4 mouse ESCs to generate functional pancreatic, endothelial and kidney cells in interspecies  
5 mouse-rat chimeras (25, 27, 35). Interestingly, long-term contribution of donor BM cells to ST-  
6 HSCs and LT-HSCs of irradiated mice was high, supporting the ability of donor HSCs to self-  
7 renew. In contrast, the short-term contribution of donor BM cells to ST-HSCs and LT-HSCs of  
8 irradiated mice was low. Low contribution of donor BM to HSCs at day 8 is not surprising  
9 considering an acute hematopoietic deficiency in lethally irradiated mice. It is possible that a  
10 majority of donor-derived HSCs undergo rapid differentiation into other hematopoietic cell types  
11 to compensate for the loss of injured hematopoietic cells after irradiation.

12         Generation of intraspecies chimeras through blastocyst complementation creates an  
13 interesting opportunity to use patient-derived iPSCs to produce tissues or even organs in large  
14 animals, for example, pigs or sheep, which can serve as “biological reactors”. However, at this  
15 stage of technological advances it is impossible to restrict the integration of ESC/iPSC-derived  
16 cells into selected organs or cell types. Off-target integration of ESCs and iPSCs into the brain,  
17 testes and sensory organs raises important ethical concerns for the use of human-animal  
18 chimeras in regenerative medicine (53, 54). To improve the selectivity of ESC/iPSC integration  
19 into chimeric tissues, various genetic modifications can be introduced into the host embryos to  
20 advance the technology. Harvest of tissues from chimeric embryos instead of adult chimeras  
21 can alleviate some of the ethical concerns, suggesting a possibility of using chimeric embryos  
22 as a potential source of patient-specific hematopoietic progenitor cells.

23         In summary, blastocyst complementation of rat embryos with mouse ESCs was used to  
24 simultaneously generate all hematopoietic cell lineages in the bone marrow. ESC-derived cells  
25 in mouse-rat chimeras were indistinguishable from normal mouse hematopoietic BM cells based  
26 on gene expression signatures and cell surface markers. Transplantation of ESC-derived BM



1 cells rescued lethally-irradiated syngeneic mice and resulted in long-term contribution of donor  
2 cells to hematopoietic cell lineages. Thus, the interspecies chimeras could be considered for *in*  
3 *vivo* differentiation of patient-derived iPSCs into hematopoietic cell lineages for future cell  
4 therapies.  
5

1 **ACKNOWLEDGMENTS**

2 We thank Mrs. Erika Smith for excellent secretarial support. This work was supported by NIH  
3 Grants HL141174 (to V.V.K.), HL149631 (to V.V.K.) and HL152973 (to V.V.K and T.V.K.).

4

5 **AUTHOR CONTRIBUTIONS**

6 B.W. and V.V.K., designed the study; B.W., G.W. and E.L., conducted experiments; G.W.,  
7 conducted bioinformatic analyses; B.W., G.W., E.L., O.A.K., Z.T., S.D., and T.V.K., analyzed the  
8 data and provided critical insights; B.W., O.A.K. and V.V.K., wrote the manuscript with input  
9 from all authors.

10

**DISCLOSURE OF CONFLICT OF INTEREST**

11 Authors of this manuscript have no conflicts of interest.

12

13

## 1 REFERENCES

- 2 1. Baccin C, Al-Sabah J, Velten L, Helbling PM, Grunschlager F, Hernandez-Malmierca P,  
3 Nombela-Arrieta C, Steinmetz LM, Trumpp A, Haas S. Combined single-cell and spatial  
4 transcriptomics reveal the molecular, cellular and spatial bone marrow niche organization.  
5 *Nature cell biology* 2020; 22: 38-48.
- 6 2. Tikhonova AN, Dolgalev I, Hu H, Sivaraj KK, Hoxha E, Cuesta-Dominguez A, Pinho S,  
7 Akhmetzyanova I, Gao J, Witkowski M, Guillamot M, Gutkin MC, Zhang Y, Marier C,  
8 Diefenbach C, Kousteni S, Heguy A, Zhong H, Fooksman DR, Butler JM, Economides A,  
9 Frenette PS, Adams RH, Satija R, Tsirigos A, Aifantis I. The bone marrow  
10 microenvironment at single-cell resolution. *Nature* 2019; 569: 222-228.
- 11 3. Baryawno N, Przybylski D, Kowalczyk MS, Kfoury Y, Severe N, Gustafsson K, Kokkaliaris  
12 KD, Mercier F, Tabaka M, Hofree M, Dionne D, Papazian A, Lee D, Ashenberg O,  
13 Subramanian A, Vaishnav ED, Rozenblatt-Rosen O, Regev A, Scadden DT. A Cellular  
14 Taxonomy of the Bone Marrow Stroma in Homeostasis and Leukemia. *Cell* 2019; 177:  
15 1915-1932 e1916.
- 16 4. Rowe RG, Mandelbaum J, Zon LI, Daley GQ. Engineering Hematopoietic Stem Cells:  
17 Lessons from Development. *Cell stem cell* 2016; 18: 707-720.
- 18 5. Vo LT, Daley GQ. De novo generation of HSCs from somatic and pluripotent stem cell  
19 sources. *Blood* 2015; 125: 2641-2648.
- 20 6. Haas S, Trumpp A, Milsom MD. Causes and Consequences of Hematopoietic Stem Cell  
21 Heterogeneity. *Cell stem cell* 2018; 22: 627-638.
- 22 7. Purton LE, Scadden DT. Limiting factors in murine hematopoietic stem cell assays. *Cell stem*  
23 *cell* 2007; 1: 263-270.
- 24 8. Nestorowa S, Hamey FK, Pijuan Sala B, Diamanti E, Shepherd M, Laurenti E, Wilson NK,  
25 Kent DG, Gottgens B. A single-cell resolution map of mouse hematopoietic stem and  
26 progenitor cell differentiation. *Blood* 2016; 128: e20-31.
- 27 9. Kitajima K, Minehata K, Sakimura K, Nakano T, Hara T. In vitro generation of HSC-like cells  
28 from murine ESCs/iPSCs by enforced expression of LIM-homeobox transcription factor  
29 Lhx2. *Blood* 2011; 117: 3748-3758.
- 30 10. Ledran MH, Krassowska A, Armstrong L, Dimmick I, Renstrom J, Lang R, Yung S,  
31 Santibanez-Coref M, Dzierzak E, Stojkovic M, Oostendorp RA, Forrester L, Lako M.  
32 Efficient hematopoietic differentiation of human embryonic stem cells on stromal cells  
33 derived from hematopoietic niches. *Cell stem cell* 2008; 3: 85-98.
- 34 11. Vodyanik MA, Thomson JA, Slukvin, II. Leukosialin (CD43) defines hematopoietic  
35 progenitors in human embryonic stem cell differentiation cultures. *Blood* 2006; 108:  
36 2095-2105.
- 37 12. Grigoriadis AE, Kennedy M, Bozec A, Brunton F, Stenbeck G, Park IH, Wagner EF, Keller  
38 GM. Directed differentiation of hematopoietic precursors and functional osteoclasts from  
39 human ES and iPS cells. *Blood* 2010; 115: 2769-2776.
- 40 13. Amabile G, Welner RS, Nombela-Arrieta C, D'Alise AM, Di Ruscio A, Ebralidze AK,  
41 Kraysberg Y, Ye M, Kocher O, Neuberg DS, Khrapko K, Silberstein LE, Tenen DG. In  
42 vivo generation of transplantable human hematopoietic cells from induced pluripotent  
43 stem cells. *Blood* 2013; 121: 1255-1264.
- 44 14. Sugimura R, Jha DK, Han A, Soria-Valles C, da Rocha EL, Lu YF, Goettel JA, Serrao E,  
45 Rowe RG, Malleshiah M, Wong I, Sousa P, Zhu TN, Ditadi A, Keller G, Engelman AN,

- 1 Snapper SB, Doulatov S, Daley GQ. Haematopoietic stem and progenitor cells from  
2 human pluripotent stem cells. *Nature* 2017; 545: 432-438.
- 3 15. Doulatov S, Vo LT, Chou SS, Kim PG, Arora N, Li H, Hadland BK, Bernstein ID, Collins JJ,  
4 Zon LI, Daley GQ. Induction of multipotential hematopoietic progenitors from human  
5 pluripotent stem cells via respecification of lineage-restricted precursors. *Cell stem cell*  
6 2013; 13: 459-470.
- 7 16. Vodyanik MA, Bork JA, Thomson JA, Slukvin, II. Human embryonic stem cell-derived  
8 CD34+ cells: efficient production in the coculture with OP9 stromal cells and analysis of  
9 lymphohematopoietic potential. *Blood* 2005; 105: 617-626.
- 10 17. Galic Z, Kitchen SG, Kacena A, Subramanian A, Burke B, Cortado R, Zack JA. T lineage  
11 differentiation from human embryonic stem cells. *Proceedings of the National Academy*  
12 *of Sciences of the United States of America* 2006; 103: 11742-11747.
- 13 18. Nafria M, Keane P, Ng ES, Stanley EG, Elefanta AG, Bonifer C. Expression of RUNX1-  
14 ETO Rapidly Alters the Chromatin Landscape and Growth of Early Human Myeloid  
15 Precursor Cells. *Cell Rep* 2020; 31: 107691.
- 16 19. Kennedy M, Awong G, Sturgeon CM, Ditadi A, LaMotte-Mohs R, Zuniga-Pflucker JC,  
17 Keller G. T lymphocyte potential marks the emergence of definitive hematopoietic  
18 progenitors in human pluripotent stem cell differentiation cultures. *Cell Rep* 2012; 2:  
19 1722-1735.
- 20 20. Elcheva I, Brok-Volchanskaya V, Kumar A, Liu P, Lee JH, Tong L, Vodyanik M, Swanson  
21 S, Stewart R, Kyba M, Yakubov E, Cooke J, Thomson JA, Slukvin I. Direct induction of  
22 haematoendothelial programs in human pluripotent stem cells by transcriptional  
23 regulators. *Nature communications* 2014; 5: 4372.
- 24 21. Montel-Hagen A, Seet CS, Li S, Chick B, Zhu Y, Chang P, Tsai S, Sun V, Lopez S, Chen  
25 HC, He C, Chin CJ, Casero D, Crooks GM. Organoid-Induced Differentiation of  
26 Conventional T Cells from Human Pluripotent Stem Cells. *Cell stem cell* 2019; 24:  
27 376-389 e378.
- 28 22. Lu YF, Cahan P, Ross S, Sahalie J, Sousa PM, Hadland BK, Cai W, Serrao E, Engelman AN,  
29 Bernstein ID, Daley GQ. Engineered Murine HSCs Reconstitute Multi-lineage  
30 Hematopoiesis and Adaptive Immunity. *Cell Rep* 2016; 17: 3178-3192.
- 31 23. Lin Y, Kobayashi M, Azevedo Portilho N, Mishra A, Gao H, Liu Y, Wenzel P, Davis B,  
32 Yoder MC, Yoshimoto M. Long-Term Engraftment of ESC-Derived B-1 Progenitor Cells  
33 Supports HSC-Independent Lymphopoiesis. *Stem Cell Reports* 2019; 12: 572-583.
- 34 24. Kobayashi T, Yamaguchi T, Hamanaka S, Kato-Itoh M, Yamazaki Y, Ibata M, Sato H, Lee  
35 YS, Usui J, Knisely AS, Hirabayashi M, Nakauchi H. Generation of rat pancreas in  
36 mouse by interspecific blastocyst injection of pluripotent stem cells. *Cell* 2010; 142:  
37 787-799.
- 38 25. Yamaguchi T, Sato H, Kato-Itoh M, Goto T, Hara H, Sanbo M, Mizuno N, Kobayashi T,  
39 Yanagida A, Umino A, Ota Y, Hamanaka S, Masaki H, Rashid ST, Hirabayashi M,  
40 Nakauchi H. Interspecies organogenesis generates autologous functional islets. *Nature*  
41 2017; 542: 191-196.
- 42 26. Matsunari H, Nagashima H, Watanabe M, Umeyama K, Nakano K, Nagaya M, Kobayashi T,  
43 Yamaguchi T, Sumazaki R, Herzenberg LA, Nakauchi H. Blastocyst complementation  
44 generates exogenic pancreas in vivo in apancreatic cloned pigs. *Proceedings of the*  
45 *National Academy of Sciences of the United States of America* 2013; 110: 4557-4562.

- 1 27. Goto T, Hara H, Sanbo M, Masaki H, Sato H, Yamaguchi T, Hochi S, Kobayashi T,  
2 Nakauchi H, Hirabayashi M. Generation of pluripotent stem cell-derived mouse kidneys  
3 in Sall1-targeted anephric rats. *Nature communications* 2019; 10: 451.
- 4 28. Hamanaka S, Umino A, Sato H, Hayama T, Yanagida A, Mizuno N, Kobayashi T, Kasai M,  
5 Suchy FP, Yamazaki S, Masaki H, Yamaguchi T, Nakauchi H. Generation of Vascular  
6 Endothelial Cells and Hematopoietic Cells by Blastocyst Complementation. *Stem Cell*  
7 *Reports* 2018; 11: 988-997.
- 8 29. Muthusamy N, Chen HC, Rajgolikar G, Butz KG, Frissora FW, Gronostajski RM.  
9 Recombination activation gene-2-deficient blastocyst complementation analysis reveals  
10 an essential role for nuclear factor I-A transcription factor in T-cell activation. *Int*  
11 *Immunol* 2011; 23: 385-390.
- 12 30. Chang AN, Liang Z, Dai HQ, Chapdelaine-Williams AM, Andrews N, Bronson RT, Schwer  
13 B, Alt FW. Neural blastocyst complementation enables mouse forebrain organogenesis.  
14 *Nature* 2018; 563: 126-130.
- 15 31. Kitahara A, Ran Q, Oda K, Yasue A, Abe M, Ye X, Sasaoka T, Tsuchida M, Sakimura K,  
16 Ajioka Y, Saijo Y, Zhou Q. Generation of Lungs by Blastocyst Complementation in  
17 Apneumatic Fgf10-Deficient Mice. *Cell Rep* 2020; 31: 107626.
- 18 32. Wen B, Li E, Ustiyani V, Wang G, Guo M, Na CL, Kalin GT, Galvan V, Xu Y, Weaver TE,  
19 Kalin TV, Whitsett JA, Kalinichenko VV. In Vivo Generation of Lung and Thyroid  
20 Tissues from Embryonic Stem Cells Using Blastocyst Complementation. *American*  
21 *journal of respiratory and critical care medicine* 2021; 203: 471-483.
- 22 33. Mori M, Furuhashi K, Danielsson JA, Hirata Y, Kakiuchi M, Lin CS, Ohta M, Riccio P,  
23 Takahashi Y, Xu X, Emala CW, Lu C, Nakauchi H, Cardoso WV. Generation of  
24 functional lungs via conditional blastocyst complementation using pluripotent stem cells.  
25 *Nature medicine* 2019; 25: 1691-1698.
- 26 34. Jansson L, Larsson J. W41/W41 blastocyst complementation: a system for genetic modeling  
27 of hematopoiesis. *Blood* 2010; 115: 47-50.
- 28 35. Wang G, Wen B, Ren X, Li E, Zhang Y, Guo M, Xu Y, Whitsett JA, Kalin TV,  
29 Kalinichenko VV. Generation of Pulmonary Endothelial Progenitor Cells for Cell-based  
30 Therapy Using Interspecies Mouse-Rat Chimeras. *American journal of respiratory and*  
31 *critical care medicine* 2021; 204: 326-338.
- 32 36. Li E, Ustiyani V, Wen B, Kalin GT, Whitsett JA, Kalin TV, Kalinichenko VV. Blastocyst  
33 complementation reveals that NKX2-1 establishes the proximal-peripheral boundary of  
34 the airway epithelium. *Dev Dyn* 2021; 250: 1001-1020.
- 35 37. Sun F, Wang G, Pradhan A, Xu K, Gomez-Arroyo J, Zhang Y, Kalin GT, Deng Z, Vagnozzi  
36 RJ, He H, Dunn AW, Wang Y, York AJ, Hegde RS, Woods JC, Kalin TV, Molkentin JD,  
37 Kalinichenko VV. Nanoparticle Delivery of STAT3 Alleviates Pulmonary Hypertension  
38 in a Mouse Model of Alveolar Capillary Dysplasia. *Circulation* 2021.
- 39 38. Kalin TV, Meliton L, Meliton AY, Zhu X, Whitsett JA, Kalinichenko VV. Pulmonary  
40 mastocytosis and enhanced lung inflammation in mice heterozygous null for the Foxf1  
41 gene. *American journal of respiratory cell and molecular biology* 2008; 39: 390-399.
- 42 39. Wang X, Bhattacharyya D, Dennewitz MB, Zhou Y, Kalinichenko VV, Lepe R, Costa RH.  
43 Rapid Hepatocyte Nuclear Translocation of the Forkhead Box M1B (FoxM1B)  
44 Transcription factor Causes a Transient Increase in Size of Regenerating Transgenic  
45 Hepatocytes. *Gene Expression* 2003; 11: 149-162.

- 1 40. Kalinichenko VV, Gusarova GA, Shin B, Costa R. The Forkhead Box F1 Transcription  
2 Factor is Expressed in Brain and Head Mesenchyme during Mouse Embryonic  
3 Development. *Gene Expression Patterns* 2003; 3: 153-158.
- 4 41. Kim IM, Zhou Y, Ramakrishna S, Hughes DE, Solway J, Costa RH, Kalinichenko VV.  
5 Functional characterization of evolutionary conserved DNA regions in forkhead box fl  
6 gene locus. *The Journal of biological chemistry* 2005; 280: 37908-37916.
- 7 42. Bolte C, Zhang Y, Wang IC, Kalin TV, Molkentin JD, Kalinichenko VV. Expression of  
8 Foxm1 transcription factor in cardiomyocytes is required for myocardial development.  
9 *PloS one* 2011; 6: e22217.
- 10 43. Guo M, Du Y, Gokey JJ, Ray S, Bell SM, Adam M, Sudha P, Perl AK, Deshmukh H, Potter  
11 SS, Whitsett JA, Xu Y. Single cell RNA analysis identifies cellular heterogeneity and  
12 adaptive responses of the lung at birth. *Nature communications* 2019; 10: 37.
- 13 44. Ren X, Ustiyani V, Guo M, Wang G, Bolte C, Zhang Y, Xu Y, Whitsett JA, Kalin TV,  
14 Kalinichenko VV. Postnatal Alveologenesis Depends on FOXF1 Signaling in c-KIT(+)  
15 Endothelial Progenitor Cells. *American journal of respiratory and critical care medicine*  
16 2019; 200: 1164-1176.
- 17 45. Xia H, Ren X, Bolte CS, Ustiyani V, Zhang Y, Shah TA, Kalin TV, Whitsett JA,  
18 Kalinichenko VV. Foxm1 regulates resolution of hyperoxic lung injury in newborns.  
19 *American journal of respiratory cell and molecular biology* 2015; 52: 611-621.
- 20 46. Bolte C, Flood HM, Ren X, Jagannathan S, Barski A, Kalin TV, Kalinichenko VV. FOXF1  
21 transcription factor promotes lung regeneration after partial pneumonectomy. *Sci Rep*  
22 2017; 7: 10690.
- 23 47. Ren X, Shah TA, Ustiyani V, Zhang Y, Shinn J, Chen G, Whitsett JA, Kalin TV,  
24 Kalinichenko VV. FOXM1 promotes allergen-induced goblet cell metaplasia and  
25 pulmonary inflammation. *Molecular and cellular biology* 2013; 33: 371-386.
- 26 48. Sun L, Ren X, Wang IC, Pradhan A, Zhang Y, Flood HM, Han B, Whitsett JA, Kalin TV,  
27 Kalinichenko VV. The FOXM1 inhibitor RCM-1 suppresses goblet cell metaplasia and  
28 prevents IL-13 and STAT6 signaling in allergen-exposed mice. *Sci Signal* 2017; 10.
- 29 49. Ren X, Zhang Y, Snyder J, Cross ER, Shah TA, Kalin TV, Kalinichenko VV. Forkhead box  
30 M1 transcription factor is required for macrophage recruitment during liver repair.  
31 *Molecular and cellular biology* 2010; 30: 5381-5393.
- 32 50. Bolte C, Ustiyani V, Ren X, Dunn AW, Pradhan A, Wang G, Kolesnichenko OA, Deng Z,  
33 Zhang Y, Shi D, Greenberg JM, Jobe AH, Kalin TV, Kalinichenko VV. Nanoparticle  
34 Delivery of Proangiogenic Transcription Factors into the Neonatal Circulation Inhibits  
35 Alveolar Simplification Caused by Hyperoxia. *American journal of respiratory and*  
36 *critical care medicine* 2020; 202: 100-111.
- 37 51. Pradhan A, Dunn A, Ustiyani V, Bolte C, Wang G, Whitsett JA, Zhang Y, Porollo A, Hu YC,  
38 Xiao R, Szafranski P, Shi D, Stankiewicz P, Kalin TV, Kalinichenko VV. The S52F  
39 FOXF1 Mutation Inhibits STAT3 Signaling and Causes Alveolar Capillary Dysplasia.  
40 *American journal of respiratory and critical care medicine* 2019; 200: 1045-1056.
- 41 52. Cai Y, Bolte C, Le T, Goda C, Xu Y, Kalin TV, Kalinichenko VV. FOXF1 maintains  
42 endothelial barrier function and prevents edema after lung injury. *Sci Signal* 2016; 9: ra40.
- 43 53. Wu J, Greely HT, Jaenisch R, Nakauchi H, Rossant J, Belmonte JC. Stem cells and  
44 interspecies chimaeras. *Nature* 2016; 540: 51-59.
- 45 54. Masaki H, Nakauchi H. Interspecies chimeras for human stem cell research. *Development*  
46 *(Cambridge, England)* 2017; 144: 2544-2547.
- 47



1 **FIGURE LEGENDS**

2 **Figure 1. Mouse ESCs contribute to hematopoietic stem cells in the bone marrow of**

3 **mouse-rat chimeras. A,** Schematic shows blastocyst complementation of rat embryos with

4 mouse ESCs to generate interspecies mouse-rat chimeras. GFP-labeled mouse ESCs (mESCs)

5 were injected into rat blastocysts, which were implanted into surrogate rat females to undergo

6 embryonic development in utero. Femur and tibia bones of the chimeras were used to obtain

7 bone marrow (BM) cells. **B,** Photographs of mouse-rat chimeras are taken at postnatal (P) days

8 P3, P8, P13 and P28. Mixed black and white pigmentation distinguishes the mouse-rat

9 chimeras from juvenile rats and mice. **C,** Weights of mouse-rat chimeras are shown at different

10 time points and compared to rats and mice of similar ages. Chimeras are significantly smaller

11 than rats, but larger than mice (n=7-18 in each group), p<0.01 is \*\*. **D,** Fluorescence

12 microscopy shows GFP and bright field images of femur and tibia bones from P4 rat, mouse

13 and mouse-rat chimera. **E,** FACS analysis of mouse ESC-derived (GFP-positive) cells in the

14 bone marrow of P10 mouse-rat chimeras. Lineage-negative (Lin<sup>-</sup>), LSK, ST-HSC and LT-HSC

15 cell subsets were identified in the bone marrow of mouse-rat chimeras (n=10) and control mice

16 (n=8). **F,** Histograms show GFP fluorescence of BM cells from chimeras and control mice. **G-H,**

17 FACS analysis show increased percentages of mouse LSKs and LT-HSCs in BM of mouse-rat

18 chimeras (n=10) compared to control mice (n=8), p<0.01 is \*\*, N.S. indicates no significance.

19

20 **Figure 2. Single cell RNAseq analysis identifies ESC-derived hematopoietic cell lineages**

21 **in the bone marrow of mouse-rat chimeras. A,** The integrated projection of BM hematopoietic

22 cells from mouse-rat and mouse-mouse (control) chimeras. ESC-derived BM cells were

23 obtained from the bone marrow of P10 chimeras using FACS sorting for GFP<sup>+</sup> cells. Cell

24 clusters were identified using Uniform Manifold Approximation and Projection (UMAP) method.

25 Cells derived from common lymphoid progenitor (CLP) are shown with blue dashed line. Cells



1 derived from common myeloid progenitor (CMP) are shown with yellow dashed line. Cell cluster  
2 of lymphoid-primed multipotent progenitors (LMPPs) is indicated by green dashed line. **B**,  
3 Parallel dimension UMAP plots show identical hematopoietic cell clusters in the bone marrow of  
4 mouse-mouse chimera (5308 cells) and mouse-rat chimera (6018 cells). **C**, Table shows  
5 percentages of cells in individual clusters in mouse-mouse and mouse-rat chimeras. Blue color  
6 indicates decreased percentages of cells in mouse-rat chimeras compared to mouse-mouse  
7 chimeras. Red color indicates increased percentages of cells in mouse-rat chimeras.

8

9 **Figure 3. ESC-derived lymphoid cell types in mouse-rat and mouse-mouse chimeras**  
10 **exhibit identical gene expression profiles.** **A**, Heatmap shows significant similarities in gene  
11 expression signatures of lymphoid progenitor cells, Pro-B, Pre-B, B and T cells obtained from  
12 mouse-rat (R) and mouse-mouse chimeras (M). Single cell RNAseq was performed using BM  
13 cell suspensions that were FACS-sorted for GFP to identify ESC-derived cells. **B**, Linear  
14 regression analysis shows the correlation index (R) between gene expression profiles in  
15 individual lymphoid cell clusters from mouse-rat and mouse-mouse chimeras.

16

17 **Figure 4. ESC-derived myeloid cell types in mouse-rat and mouse-mouse chimeras**  
18 **exhibit similar gene expression profiles.** **A**, Heatmap shows significant similarities in gene  
19 expression signatures of myeloid progenitor cells, megakaryocytes, erythroid progenitor cells,  
20 basophils, eosinophils, neutrophils, dendritic cells, monocytes and neutrophil progenitor cells  
21 obtained from mouse-rat (R) and mouse-mouse chimeras (M). Single cell RNAseq was  
22 performed using BM cell suspensions that were FACS-sorted for GFP to identify ESC-derived  
23 cells. **B**, Linear regression analysis shows the correlation index (R) between gene expression  
24 profiles in individual myeloid cell clusters from mouse-rat and mouse-mouse chimeras.

1

2 **Figure 5. Transplantation of mouse ESC-derived BM cells from interspecies mouse-rat**

3 **chimeras rescues lethally irradiated syngeneic mice. A,** Schematic diagram shows

4 transplantation of ESC-derived bone marrow cells (BMC) into lethally irradiated (IR) mice. ESC-

5 derived cells were obtained from the bone marrow of juvenile mouse-rat chimeras using FACS-

6 sorting for GFP<sup>+</sup> cells. Bone marrow and peripheral blood were harvested 8 days and 5 months

7 after BM transplantation. **B,** Kaplan-Meier survival analysis shows a 100% mortality in irradiated

8 mice. Survival is dramatically improved after transplantation of irradiated mice with ESC-derived

9 BM cells obtained from mouse-rat chimeras (IR + BMC). Survival in untreated wild type (wt)

10 mice is shown as a control (n=12-20 mice in each group). **C,** Photograph shows irradiated

11 C57BL/6 mice 5 months after successful bone marrow transplantation. Untreated C57BL/6

12 mouse is shown as a control. Grey color of irradiated mice (arrows) is consistent with large

13 doses of whole-body radiation treatment.

14

15 **Figure 6. Transplantation of mouse ESC-derived BM cells from interspecies mouse-rat**

16 **chimeras restores blood hematopoietic cell lineages in lethally irradiated syngeneic mice.**

17 **A,** FACS analysis shows identification of granulocytes, B cells, monocytes, T cells and erythroid

18 cells in the peripheral blood 8 days and 5 months after BM transplantation. Blood samples were

19 obtained from untreated mice (no IR), lethally irradiated mice without bone marrow transplant

20 (IR), and lethally irradiated mice with bone marrow transplant (IR+BMC). BM transplantation

21 was performed using ESC-derived BM cells obtained from juvenile mouse-rat chimeras. **B,**

22 Blood analysis shows that transplantation with ESC-derived BM cells from mouse-rat chimeras

23 increases white blood cell (WBC) counts and red blood cell (RBC) counts in the peripheral blood.

24 Concentrations of lymphocytes, monocytes and neutrophil in the blood were also increased

25 after BM transplantation (n=9-15 mice in each group). **C-D,** FACS analysis for GFP<sup>+</sup> cells in

1 each cell subset shows that ESC-derived BM cells from mouse-rat chimeras contribute to  
2 multiple hematopoietic cell lineages in the peripheral blood of lethally irradiated mice (n=9-16  
3 mice in each group),  $p < 0.01$  is \*\*, N.S. indicates no significance.

4

5 **Figure 7. Transplantation of mouse ESC-derived BM cells from interspecies mouse-rat**  
6 **chimeras restores hematopoietic progenitor cells in the bone marrow of irradiated**  
7 **syngeneic mice. A,** Photographs show cell suspensions obtained from the bone marrow of  
8 untreated mice (no IR), lethally irradiated mice without bone marrow transplant (IR), and lethally  
9 irradiated mice with bone marrow transplant (IR+BMC). Mice were harvested 8 days (left image)  
10 or 5 months after BM transplantation (right image). ESC-derived BM cells from juvenile mouse-  
11 rat chimeras were used for BM transplantation. **B,** FACS analysis shows identification of  
12 Lineage<sup>-</sup> (Lin<sup>-</sup>) cells, LSKs, ST-HSCs and LT-HSCs in the bone marrow of irradiated mice 8  
13 days and 5 months after BM transplantation. **C,** FASC analysis shows that transplantation with  
14 ESC-derived BM cells from mouse-rat chimeras increases percentages of LSKs, ST-HSCs and  
15 LT-HSCs in the bone marrow of irradiated mice 5 months after BM transplantation (n=9-16 mice  
16 in each group). **D-E,** ESC-derived BM cells from mouse-rat chimeras contribute to multiple  
17 hematopoietic progenitor cells in the bone marrow of irradiated mice (n=9-16 mice in each  
18 group),  $p < 0.01$  is \*\*, N.S. indicates no significance.

19

Wen et al., Fig.1

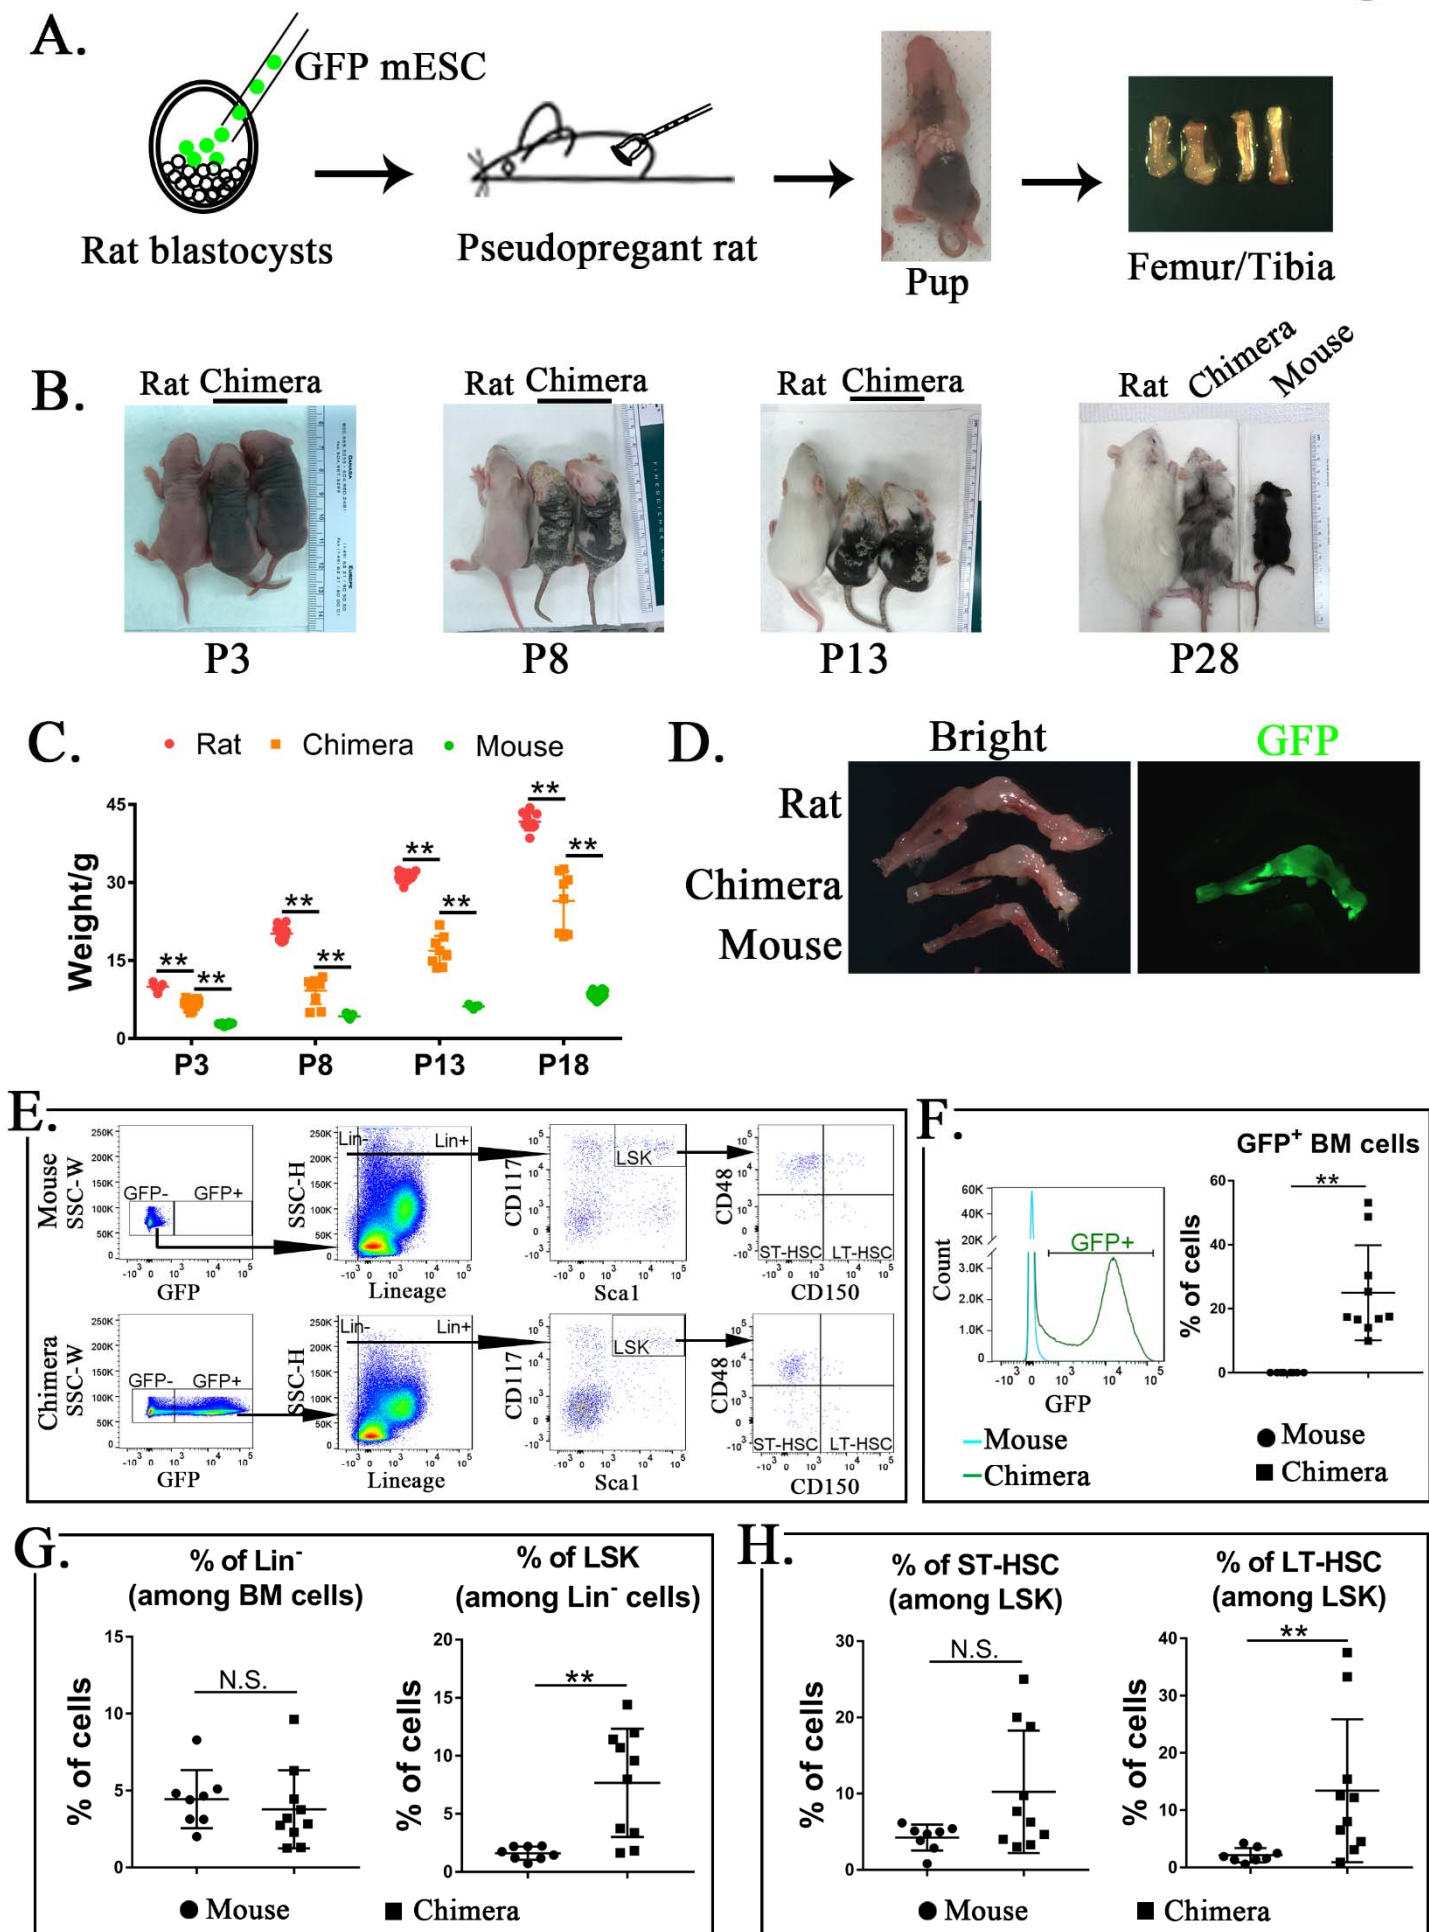

## Wen et al., Fig.2

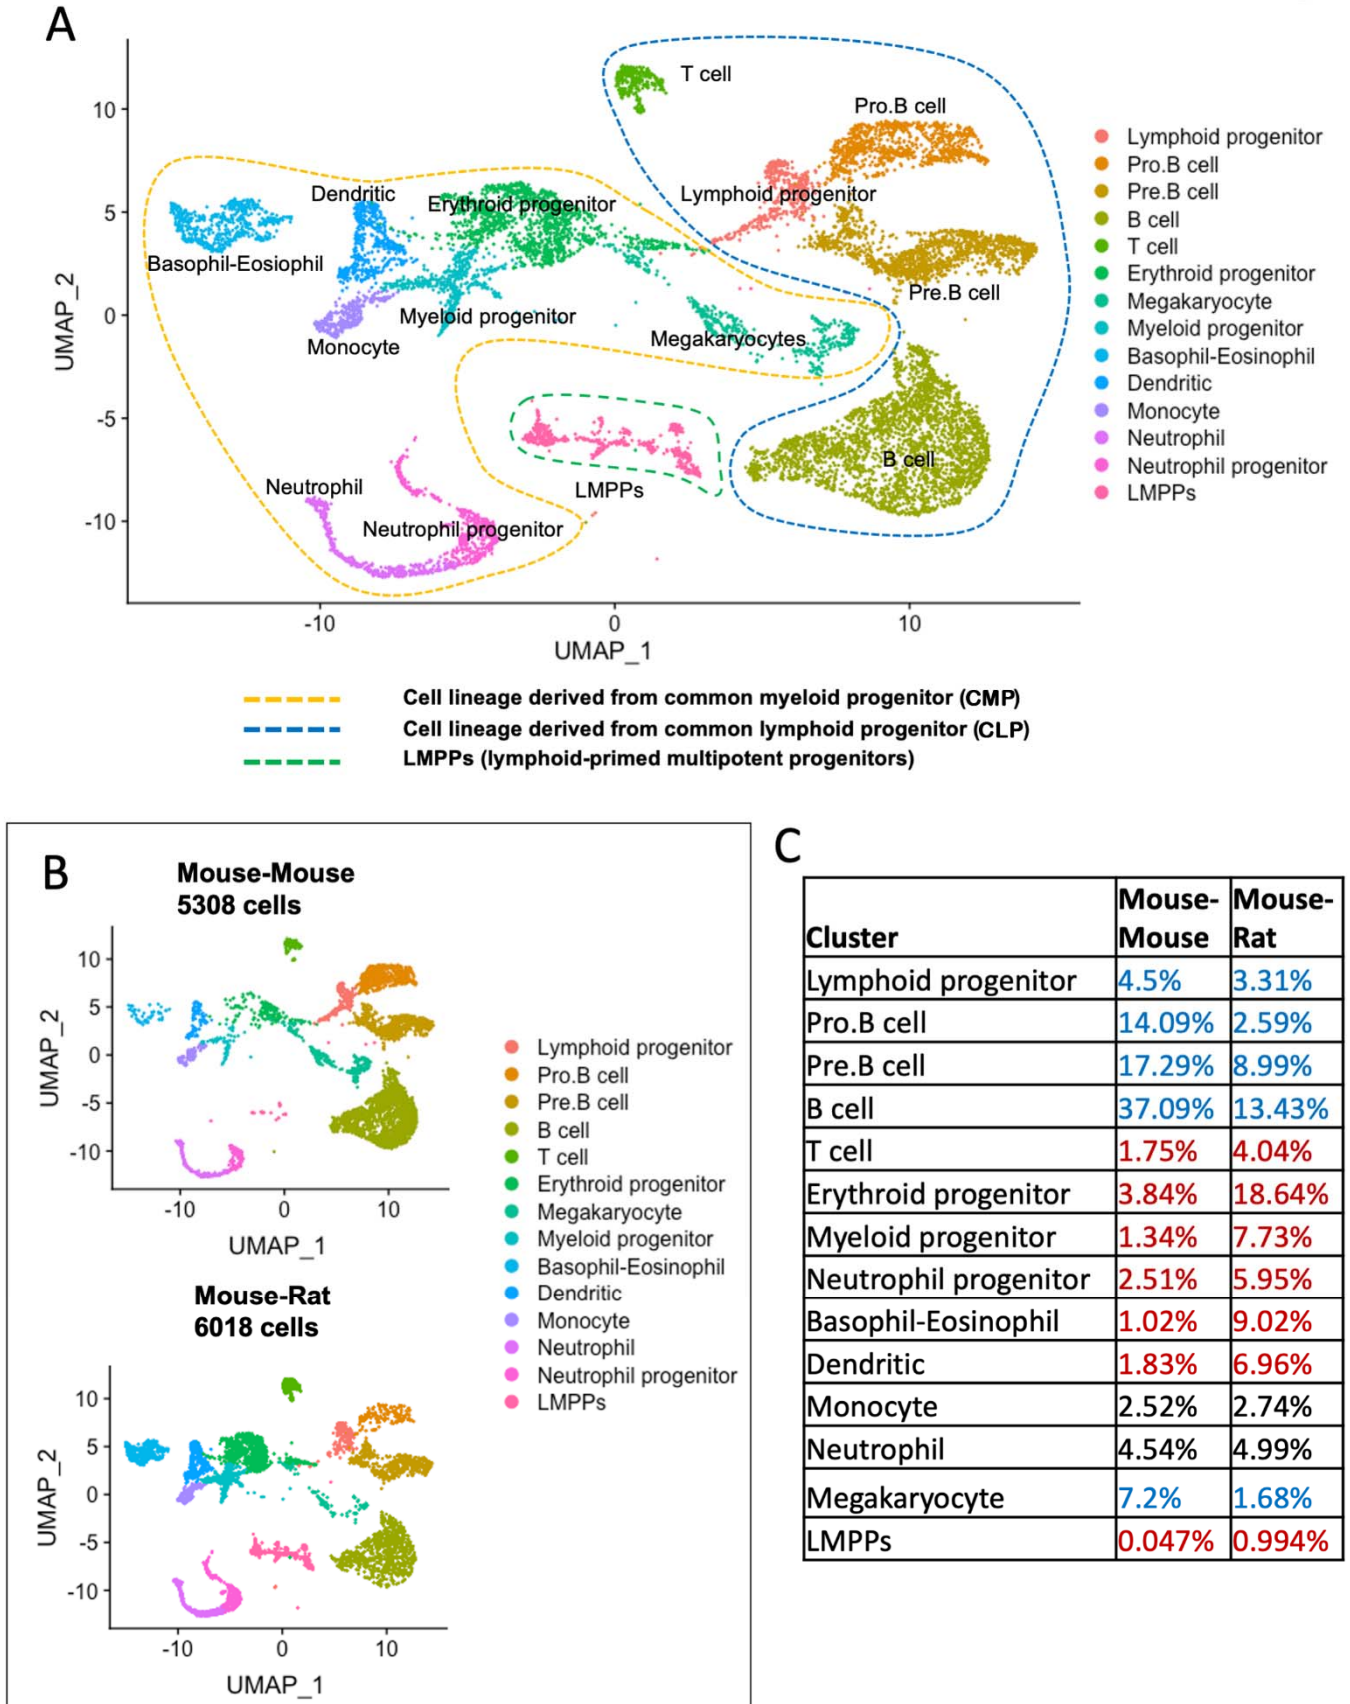

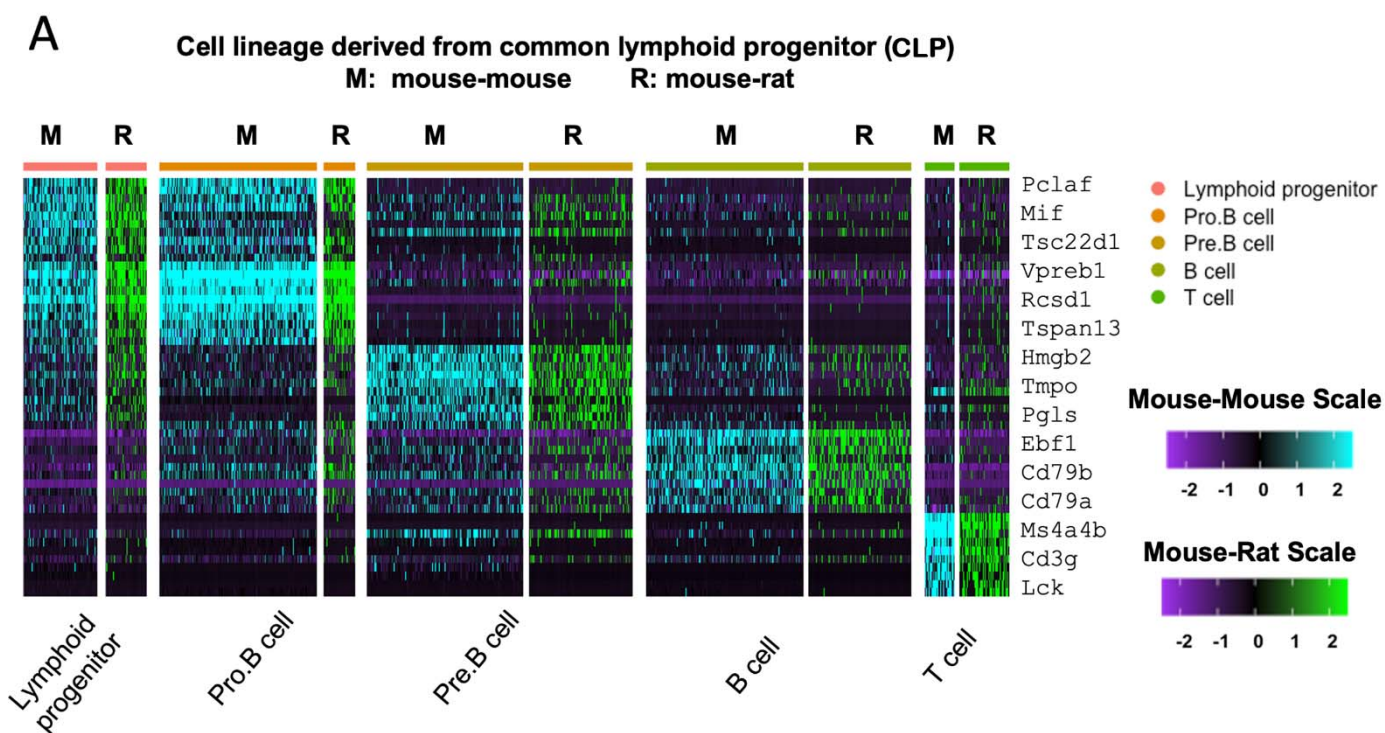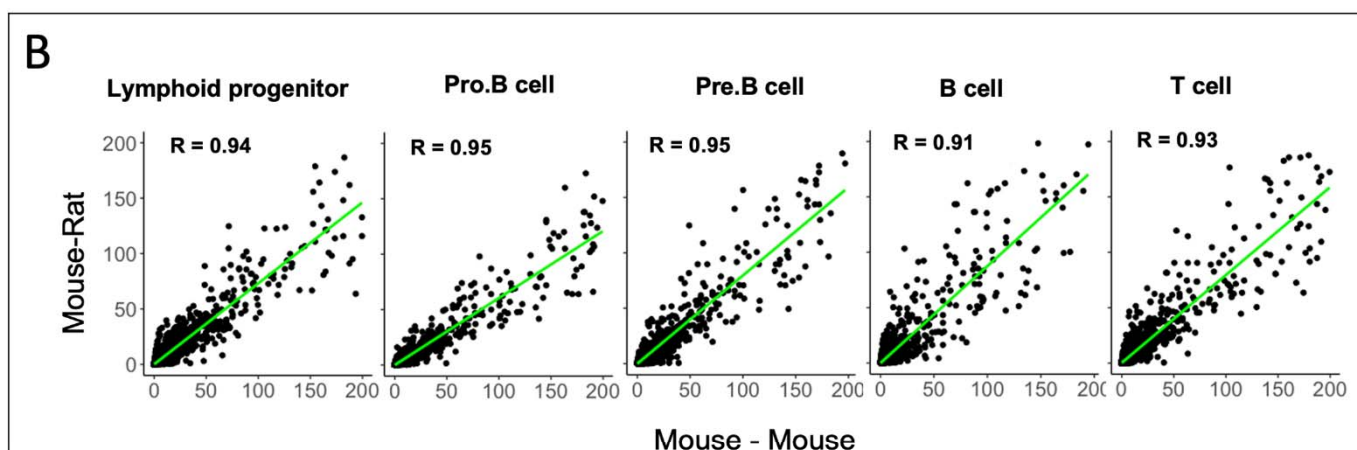

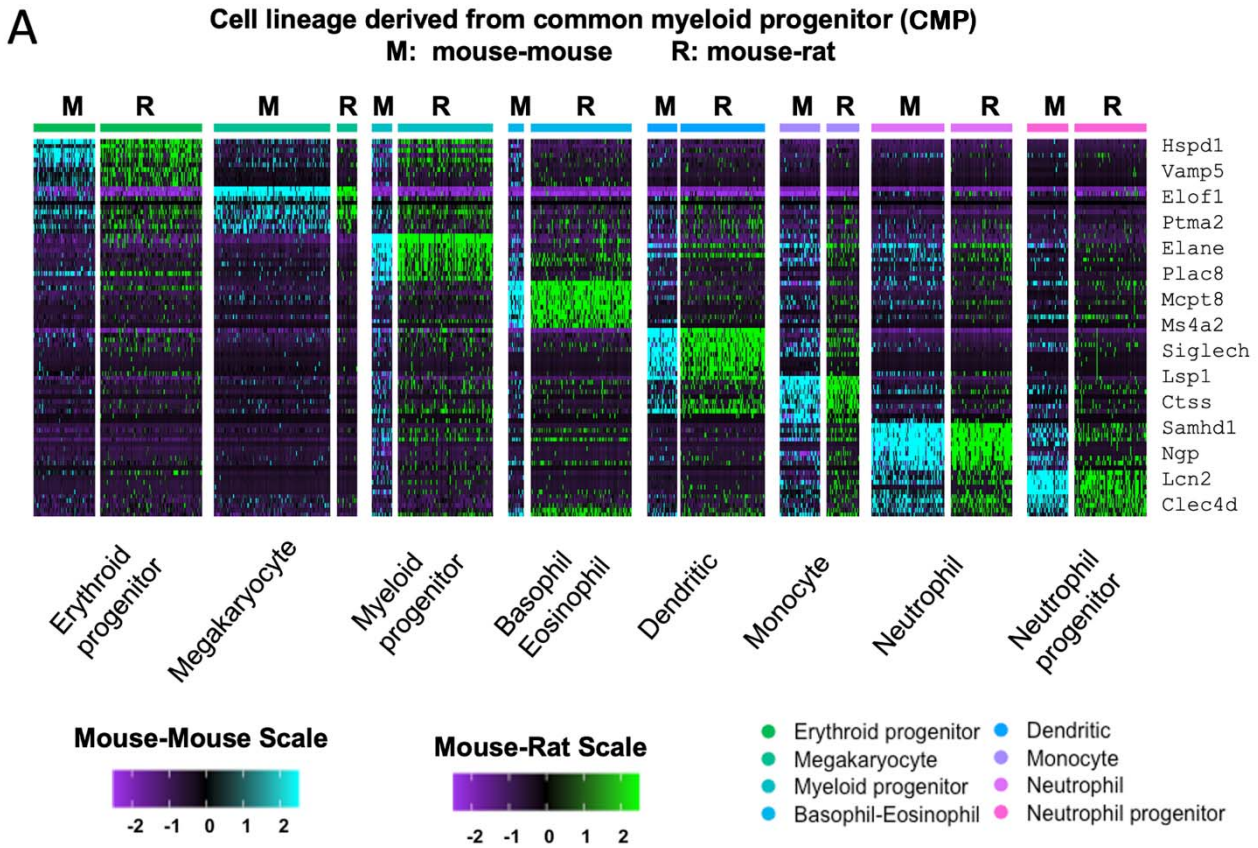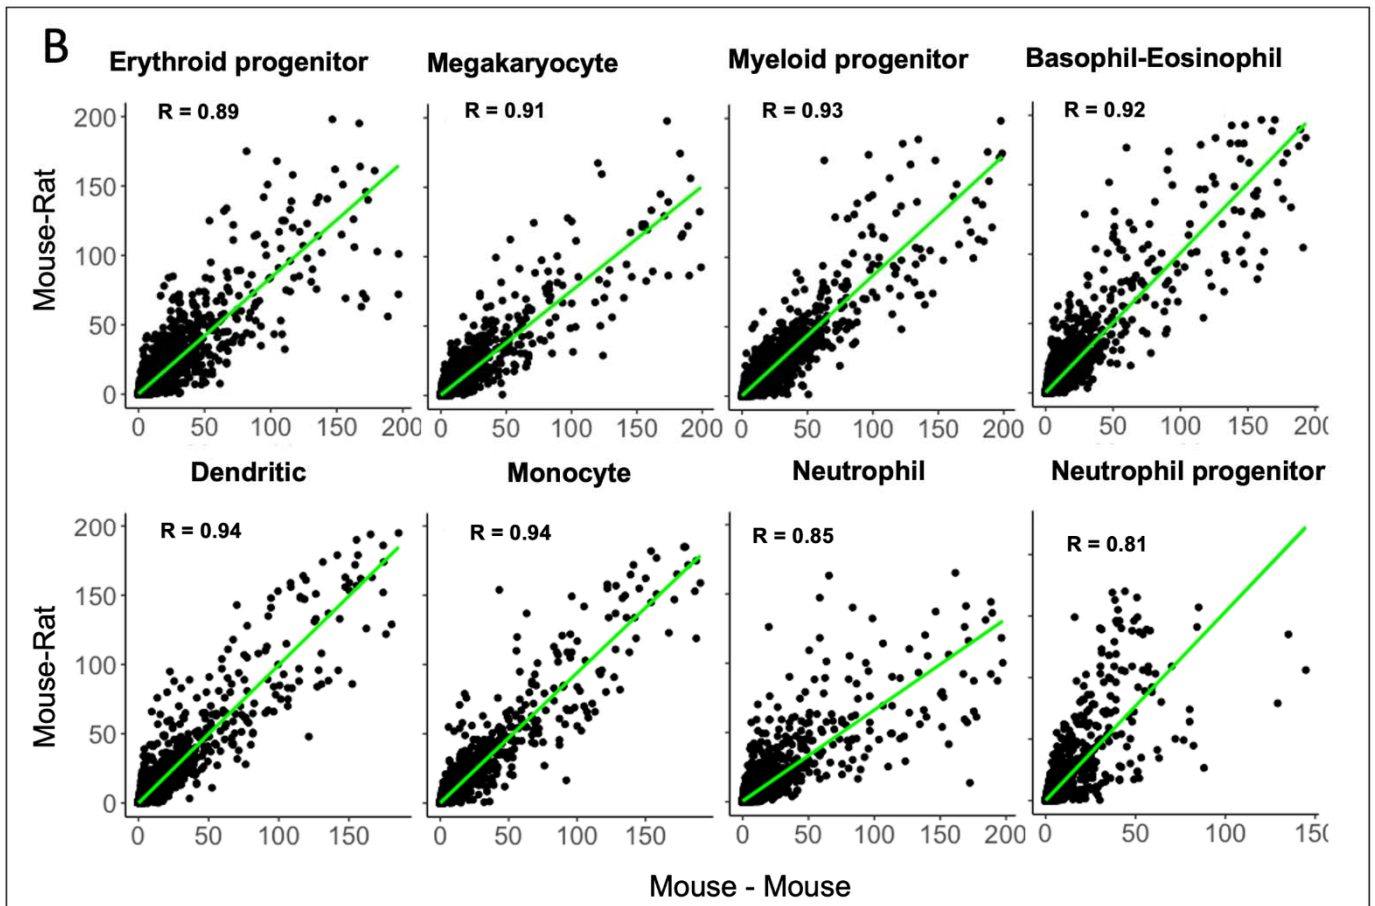

## Wen et al., Fig.5

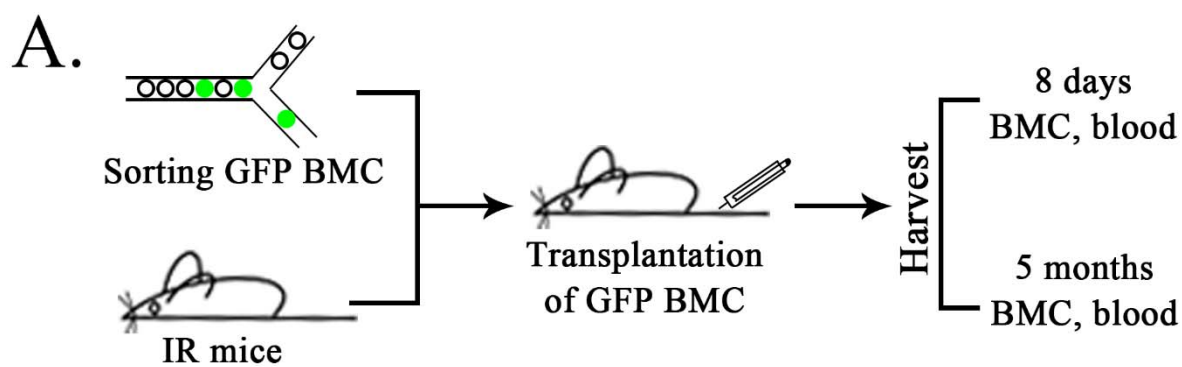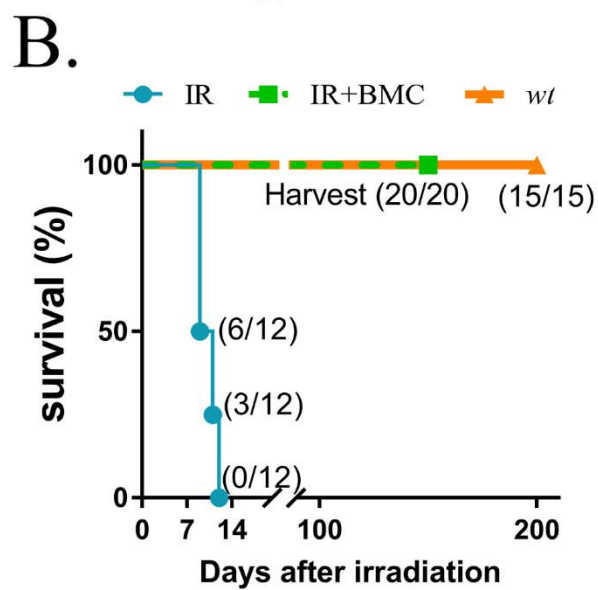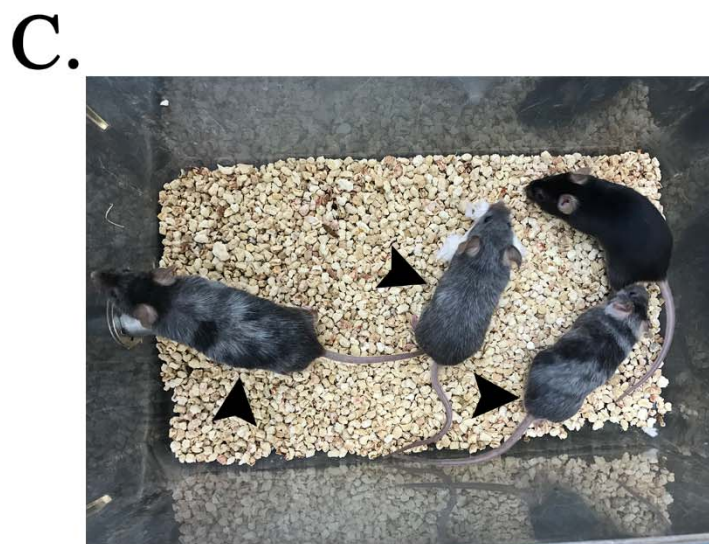



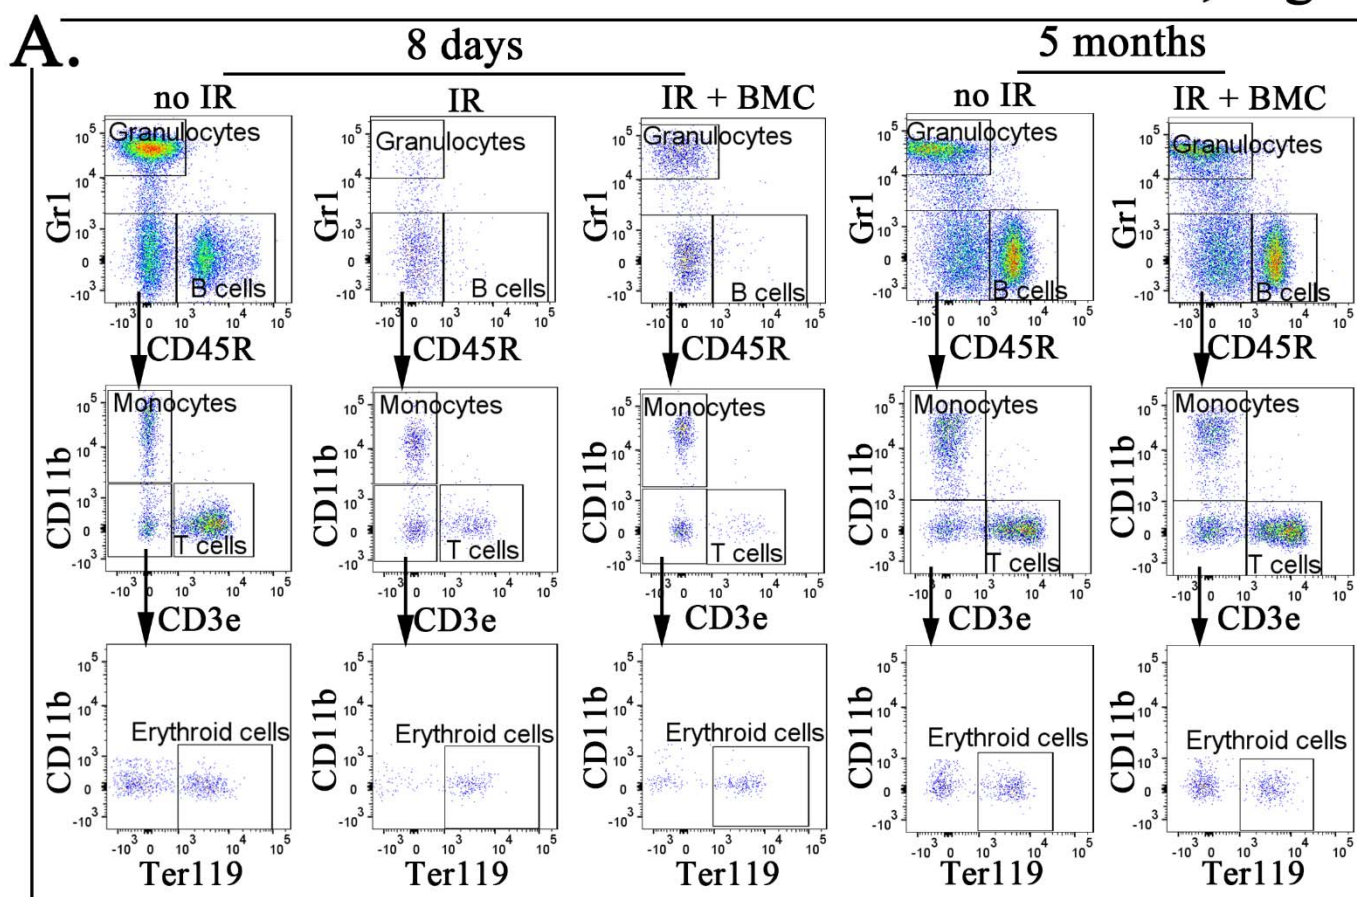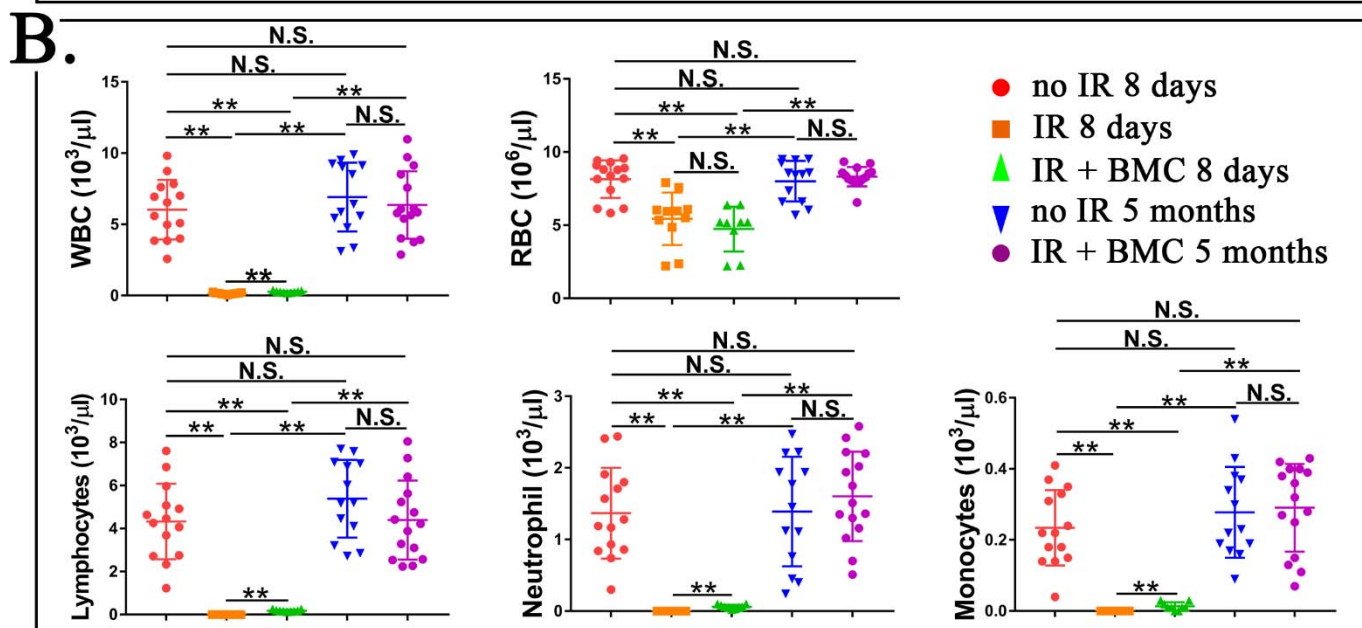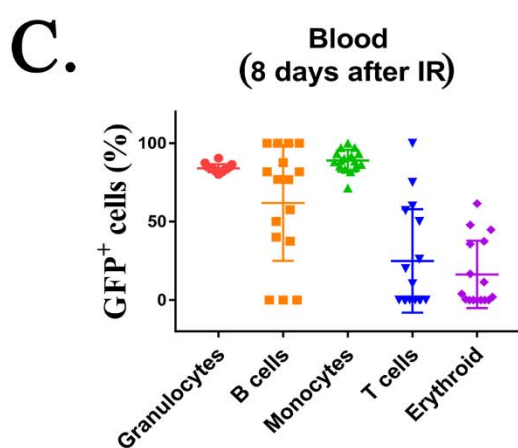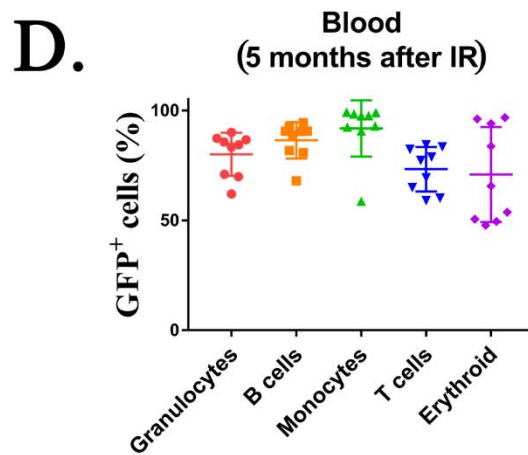

# Wen et al., Fig.7

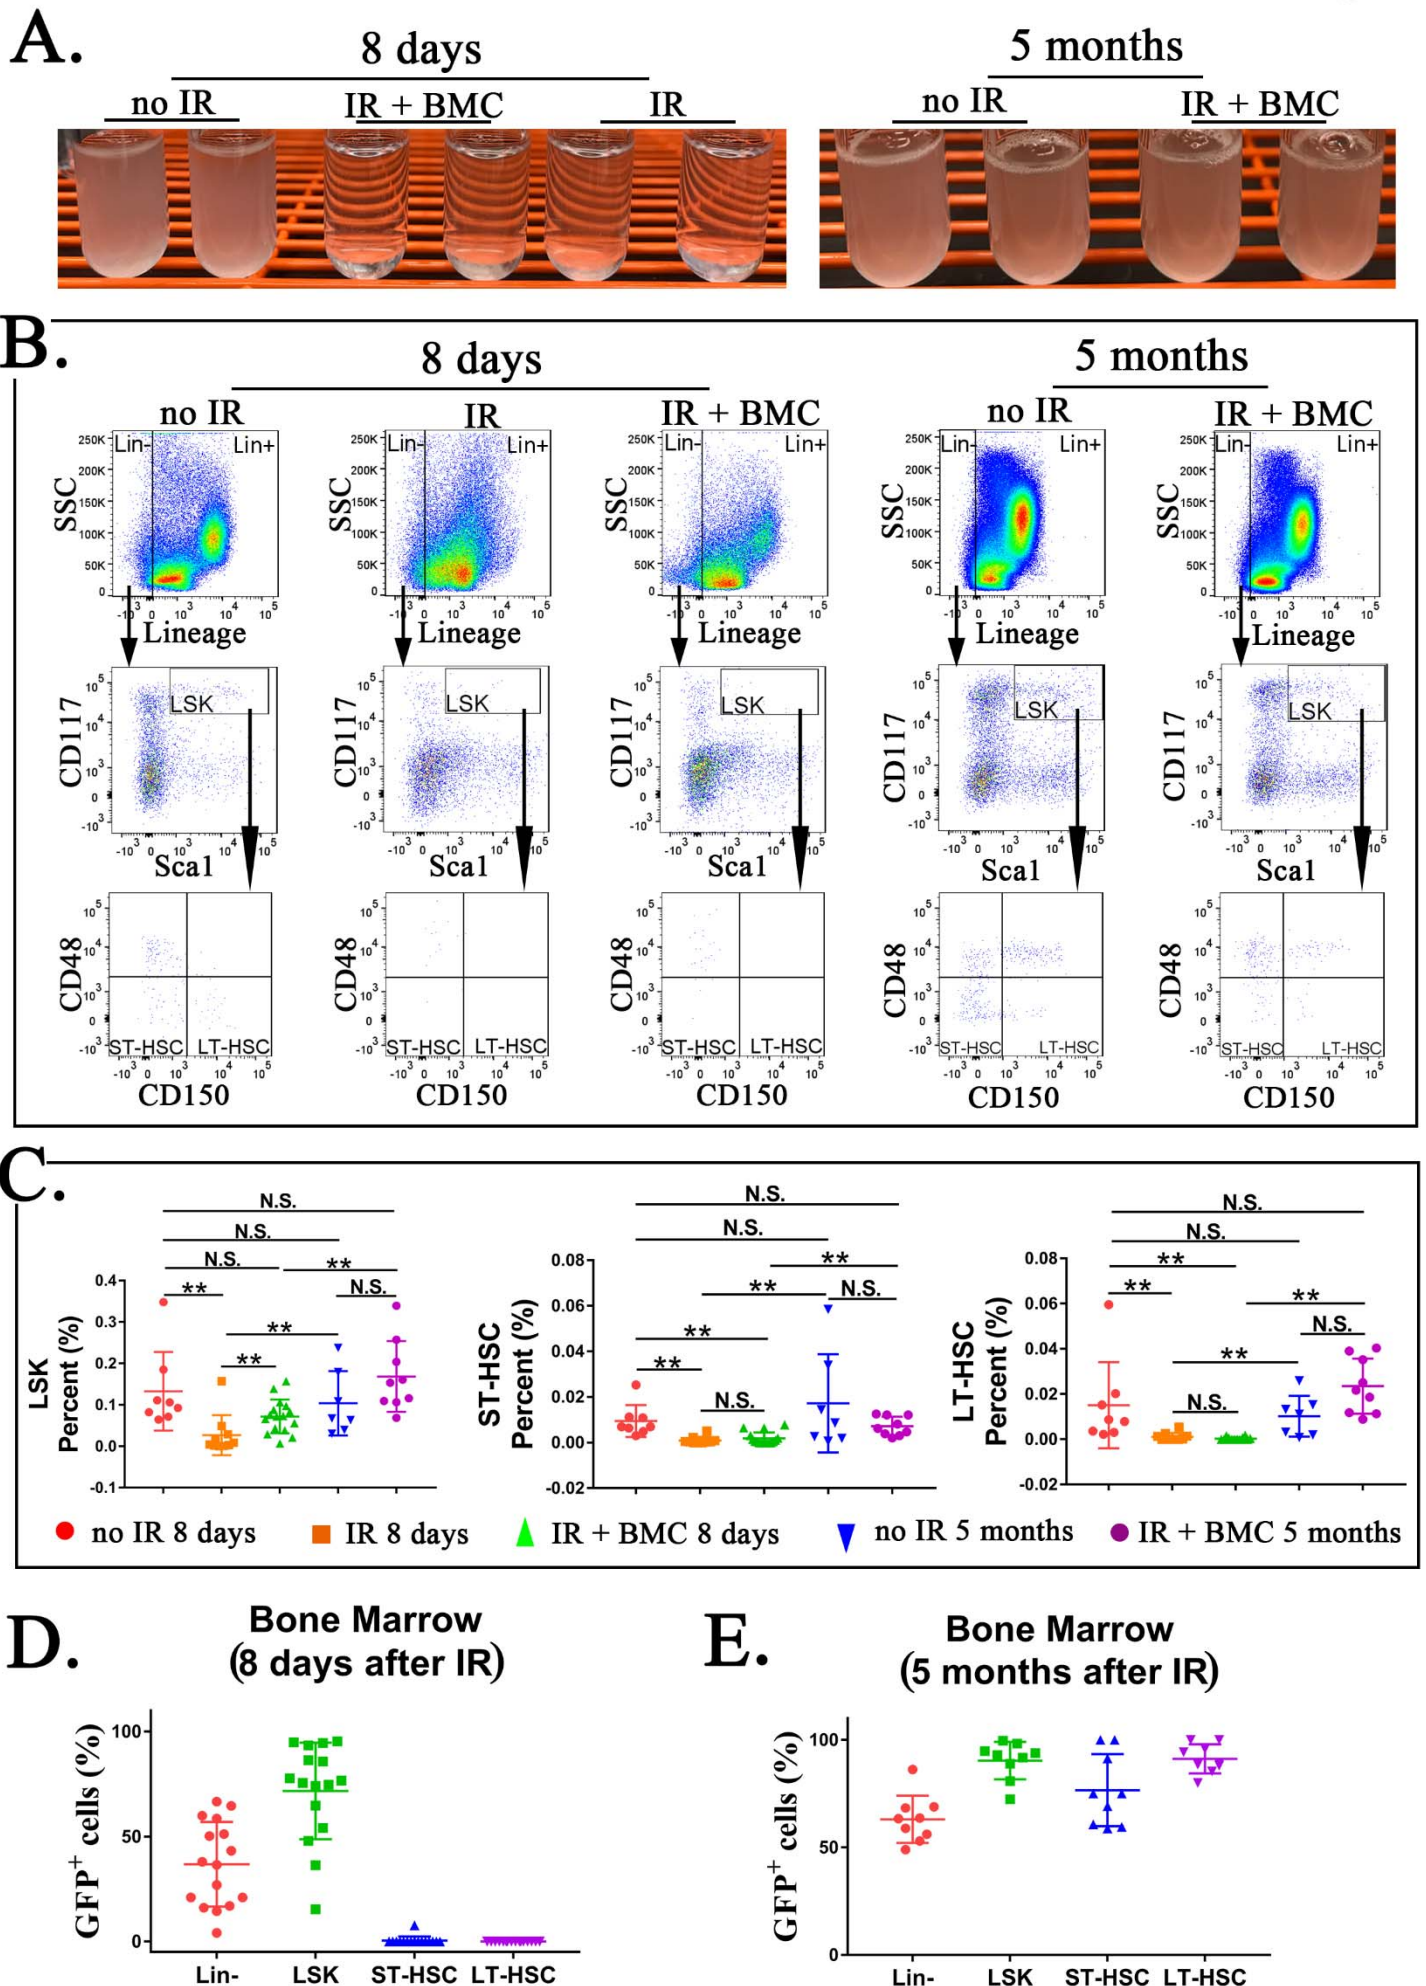

1 SUPPLEMENTARY MATERIAL

2  
3 ***In Vivo* Generation of Bone Marrow from Embryonic Stem Cells in Interspecies Chimeras**

4  
5 Bingqiang Wen<sup>1</sup>, Guolun Wang<sup>1</sup>, Enhong Li<sup>1</sup>, Olena A. Kolesnichenko<sup>1</sup>, Zhaowei Tu<sup>2</sup>, Senad  
6 Divanovic<sup>3,4</sup>, Tanya V. Kalin<sup>4,5</sup> and Vladimir V. Kalinichenko<sup>1,4,5,6</sup>  
7  
8  
9

10 <sup>1</sup>*Center for Lung Regenerative Medicine, Perinatal Institute, Cincinnati Children's Hospital*  
11 *Medical Center, Cincinnati, OH 45229, USA.*

12 <sup>2</sup>*Division of Experimental Hematology and Cancer Biology, Cincinnati Children's Hospital*  
13 *Medical Center, Cincinnati, OH 45229, USA.*

14 <sup>3</sup>*Division of Immunobiology, Cincinnati Children's Hospital Medical Center, Cincinnati, OH*  
15 *45229, USA.*

16 <sup>4</sup>*Department of Pediatrics, College of Medicine of the University of Cincinnati, Cincinnati, OH*  
17 *45229, USA.*

18 <sup>5</sup>*Division of Pulmonary Biology, Cincinnati Children's Hospital Medical Center, Cincinnati, OH*  
19 *45229, USA.*

20 <sup>6</sup>*Division of Developmental Biology, Cincinnati Children's Hospital Medical Center, Cincinnati,*  
21 *OH 45229, USA.*  
22

1 **SUPPLEMENTAL FIGURE LEGENDS**

2

3 **Supplemental Figure S1. Identification of lineage<sup>-</sup> cells, LSKs, ST-HSCs and LT-HSCs in**  
4 **the bone marrow. A,** FACS gating strategy shows the identification of lineage<sup>-</sup> (Lin<sup>-</sup>) cells, LSKs,  
5 ST-HSCs and LT-HSCs in the bone marrow of *wt* mice. **B,** Histograms show specificity of  
6 antibodies against *Lineage* antigens, CD117 (c-KIT), Sca1, CD150 and CD48. To identify mouse  
7 Lin<sup>-</sup> cells, LSKs, ST-HSCs and LT-HSCs, cell suspensions from BM of *wt* mouse, mouse-rat  
8 chimera and *wt* rat were compared to determine the gating.

9

10 **Supplemental Figure S2. Purification of mouse ESC-derived cells from bone marrow of**  
11 **mouse-rat and mouse-mouse chimeras before scRNAseq.** FACS gating strategy shows  
12 identification of ESC-derived Lin<sup>-</sup> and Lin<sup>+</sup> cell subsets in the bone marrow of mouse-rat (**A**) and  
13 mouse-mouse chimeras (**B**). Chimeric BM cells were harvested at P10.

14

15 **Supplemental Figure S3. Single cell RNAseq analysis identifies hematopoietic cell sub-**  
16 **sets in the bone marrow of mouse-rat chimeras. A,** The integrated projection of ESC-derived  
17 BM hematopoietic cells from mouse-rat and mouse-mouse (control) chimeras. Cells were  
18 obtained from the bone marrow of P10 chimeras. Cell clusters were identified using Uniform  
19 Manifold Approximation and Projection (UMAP) method. Expression of marker genes shows  
20 different hematopoietic cell clusters in the bone marrow. **B,** Genes enriched in neurons,  
21 endothelial cells, adipocytes and osteocytes are not detected in cell clusters from chimeric bone  
22 marrow.

23

1 **Supplemental Figure S4. Violin plots confirm expression of hematopoietic marker genes**  
2 **in BM cell clusters.** Single cell RNAseq was performed using ESC-derived BM hematopoietic  
3 cells from mouse-rat and mouse-mouse P10 chimeras. Cell clusters were identified using UMAP.  
4 Violin plots show expression of selected hematopoietic genes in BM cell clusters. *Ptpnc1* (*Cd45*)  
5 mRNA is expressed in all hematopoietic cell types.

6  
7 **Supplemental Figure S5. Single cell RNAseq analysis identifies genes expressed in**  
8 **hematopoietic stem cells in chimeric bone marrow.** **A**, UMAP analysis shows expression of  
9 genes enriched in hematopoietic stem cells (HSCs), including *Kit*, *Ly6a* (*Sca-1*) and *Flt3* (*Flk2*),  
10 using the integrated projection of ESC-derived BM hematopoietic cells from mouse-rat and  
11 mouse-mouse (control) chimeras. Cells were obtained from the bone marrow of P10 chimeras.  
12 **B**, *Kit<sup>+</sup>Ly6a<sup>+</sup>Flt3<sup>+</sup>* triple positive cells are identified in myeloid and erythroid progenitor cell clusters  
13 in the combined scRNAseq dataset. **C**, Separate views of triple positive cells in individual  
14 scRNAseq datasets show increased number of HSCs in mouse-rat chimera compared to mouse-  
15 mouse chimera. **D**, Heatmap shows expression of genes enriched in HSCs.

16  
17 **Supplemental Figure S6. Heatmap identifies gene expression profile of ESC-derived**  
18 **lymphoid-primed multipotent progenitors from mouse-rat and mouse-mouse chimeras.**  
19 Combined analysis of ESC-derived BM hematopoietic cells from mouse-rat and mouse-mouse  
20 chimeras compares gene expression signature of lymphoid-primed multipotent progenitor cells  
21 (LMPPs) with gene expression signatures of other myeloid and lymphoid BM cells. Single cell  
22 RNAseq was performed using BM cell suspensions from P10 chimeras. ESC-derived cells were  
23 purified using FACS.

24

1 **Supplemental Figure S7. Transplantation of irradiated mice with ESC-derived BM cells**  
2 **from mouse-rat chimeras increases concentrations of platelets, hemoglobin, basophils**  
3 **and eosinophils in the peripheral blood.** Blood samples were obtained from untreated mice  
4 (no IR), lethally irradiated mice without bone marrow transplant (IR), and lethally irradiated mice  
5 with bone marrow transplant (IR+BMC). BM transplantation was performed using ESC-derived  
6 BM cells obtained from juvenile mouse-rat chimeras. Mice were harvested 8 days or 5 months  
7 after BM transplantation. Concentrations of basophils and eosinophils in the peripheral blood were  
8 significantly increased 8 days after BM transplantation. Concentrations of platelets (PLT),  
9 hemoglobin (Hb), basophils and eosinophils were fully restored 5 months after BM transplantation  
10 (n=9-15 mice in each group), p<0.05 is \*, p<0.01 is \*\*, N.S. indicates no significance.

11

12 **Supplemental Figure S8. FACS analysis shows identification of granulocytes, B cells,**  
13 **monocytes, T cells and erythroid cells in the peripheral blood of irradiated mice after BM**  
14 **transplantation.** BM transplantation was performed using ESC-derived BM cells that were  
15 purified from juvenile mouse-rat chimeras. Blood samples were obtained from untreated mice (no  
16 IR), lethally irradiated mice without bone marrow transplant (IR), and lethally irradiated mice with  
17 bone marrow transplant (IR+BMC). Blood was harvested 8 days (**A**) or 5 months after BM  
18 transplantation (**B**) and used for FACS analysis.

19

20 **Supplemental Figure S9. Identification of ESC-derived cells in the peripheral blood of**  
21 **irradiated mice after BM transplantation.** Histograms show the presence of ESC-derived (GFP-  
22 positive) granulocytes, B cells, T cells, monocytes and erythroid cells in the peripheral blood of  
23 irradiated mice after BM transplantation (green line). Blood of mice without BM transplantation is

1 used to identify autofluorescence in GFP channel (blue line). Blood samples were harvested 8  
2 days or 5 months after BM transplantation and used for FACS analysis.

3

4 **Supplemental Figure S10. FACS analysis shows identification of Lin<sup>-</sup> cells, LSKs, ST-HSCs**  
5 **and LT-HSCs in the bone marrow of irradiated mice 8 days and 5 months after BM**  
6 **transplantation.** BM transplantation was performed using ESC-derived BM cells that were  
7 purified from juvenile mouse-rat chimeras. Bone marrow was obtained from one tibia and one  
8 fibula bones of untreated mice (no IR), lethally irradiated mice without bone marrow transplant  
9 (IR), and lethally irradiated mice with bone marrow transplant (IR+BMC). Bone marrow was  
10 harvested 8 days (**A**) or 5 months after BM transplantation (**B**) and used for FACS analysis.

11

12 **Supplemental Figure S11. Identification of ESC-derived hematopoietic cells in the bone**  
13 **marrow of irradiated mice after BM transplantation.** Histograms show the presence of ESC-  
14 derived (GFP-positive) Lin<sup>-</sup> cells, LSKs, ST-HSCs and LT-HSCs in the bone marrow of irradiated  
15 mice after BM transplantation (green line). For each cell subset, bone marrow of mice without BM  
16 transplantation is used to identify autofluorescence in GFP channel (blue line). Bone marrow was  
17 obtained from one tibia and one fibula bones 8 days or 5 months after BM transplantation.

18

1 **SUPPLEMENTAL TABLES**

2 **Supplemental Table S1.** Antibodies used for FACS analysis.

| Antibody | Manufacturer  | Catalog No. | Dilution |
|----------|---------------|-------------|----------|
| Lineage- | BD Bioscience | 561317      | 1:100    |
| CD117    | Thermo Fisher | 12-1171-83  | 1:100    |
| Sca1     | Thermo Fisher | 17-5981-81  | 1:100    |
| CD150    | Thermo Fisher | 25-1502-80  | 1:100    |
| CD45R    | Thermo Fisher | 83-0452-41  | 1:100    |
| Gr1      | Biolegend     | 108433      | 1:100    |
| CD3e     | Biolegend     | 100312      | 1:100    |
| CD11b    | Biolegend     | 101216      | 1:100    |
| Ter119   | Biolegend     | 116228      | 1:100    |
| CD48     | Thermo Fisher | 48-0481-82  | 1:100    |

3

4

5 **Supplemental Table S2.** The number and percentage of hematopoietic BM cells containing

6 both mouse and rat mRNAs (hybrid cells).

| Cluster               | Cell number | Cells with mouse and rat mRNAs | Frequency (%) |
|-----------------------|-------------|--------------------------------|---------------|
| Lymphoid progenitor   | 199         | 0                              | 0             |
| Pro.B cell            | 156         | 0                              | 0             |
| Pre.B cell            | 541         | 0                              | 0             |
| B cell                | 808         | 4                              | 0.0049505     |
| T cell                | 243         | 0                              | 0             |
| Erythroid progenitor  | 1122        | 1                              | 0.00089127    |
| Megakaryocyte         | 101         | 0                              | 0             |
| Myeloid progenitor    | 465         | 0                              | 0             |
| Basophil-Eosinophil   | 543         | 0                              | 0             |
| Dendritic             | 419         | 0                              | 0             |
| Monocyte              | 165         | 0                              | 0             |
| Neutrophil            | 300         | 1                              | 0.00333333    |
| Neutrophil progenitor | 358         | 0                              | 0             |
| Lineage-negative      | 598         | 0                              | 0             |

7

8



1

2 **Supplemental Table S3.** The number of counts and features (genes) in 6 hybrid cells identified

3 in mouse-rat chimera.

| Cell barcode       | Identity of cells based on mouse transcriptome | Mouse_nCount | Mouse_nFeature | Rat_nCount | Rat_nFeature |
|--------------------|------------------------------------------------|--------------|----------------|------------|--------------|
| AAGACTCTCGACATTG-1 | B cell                                         | 5286         | 2009           | 2044       | 889          |
| AGAAGTAAGCAGGGAG-1 | B cell                                         | 4575         | 1736           | 14761      | 3340         |
| AGGGTCCGTCTTGGTA-1 | Neutrophil                                     | 8428         | 1622           | 931        | 552          |
| CCGGTGACAGTGGCTC-1 | Erythroid progenitor                           | 43228        | 5455           | 3955       | 1415         |
| CTAACTTTCCAATCCC-1 | B cell                                         | 3735         | 1721           | 1155       | 689          |
| CTCAACCTCAACTCTT-1 | B cell                                         | 6018         | 2225           | 2320       | 1192         |

4

# Wen et al., Suppl.Fig.1

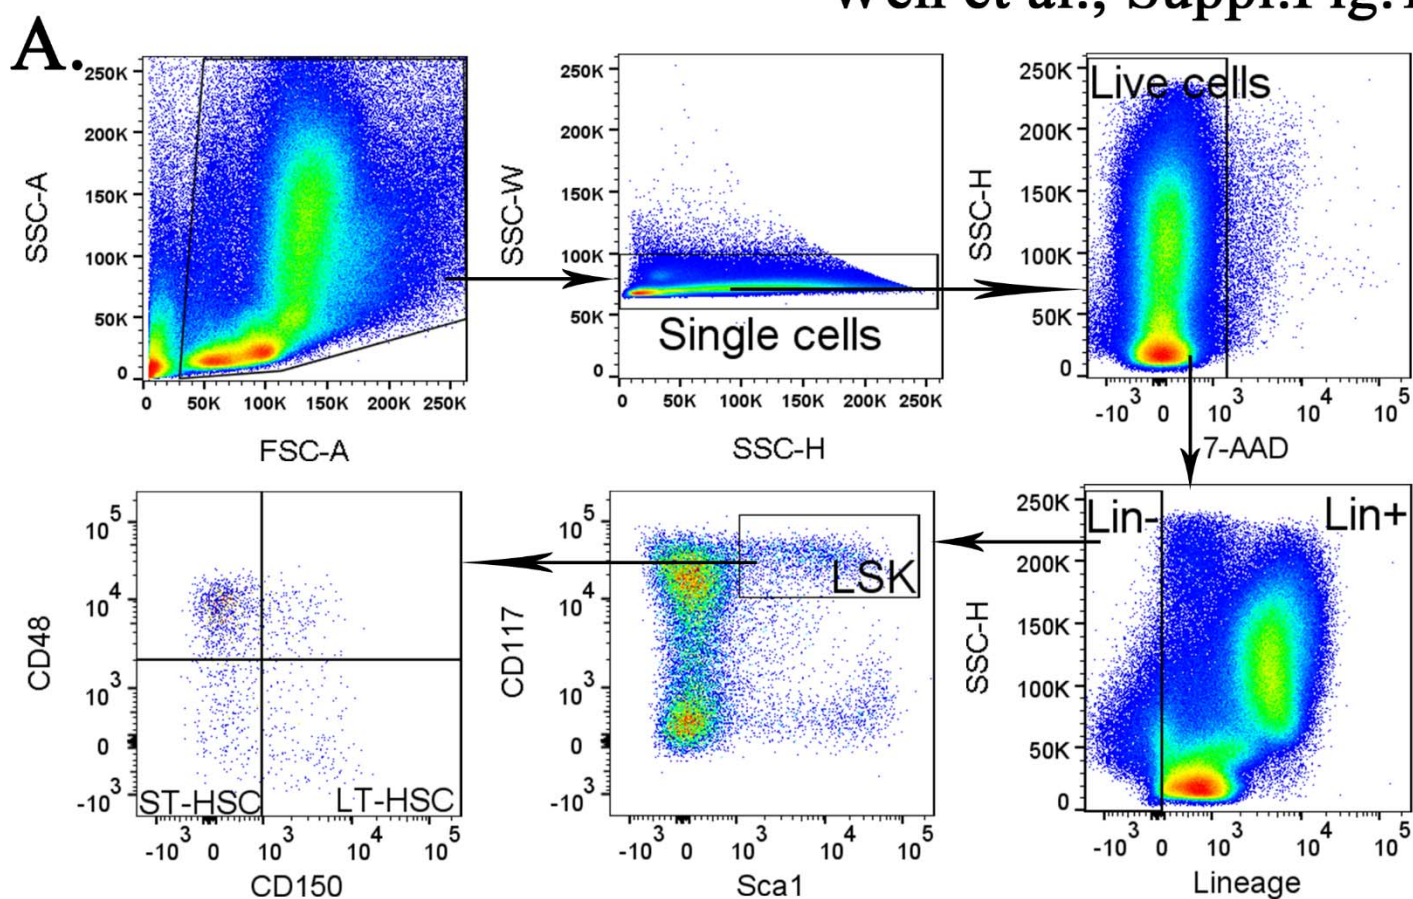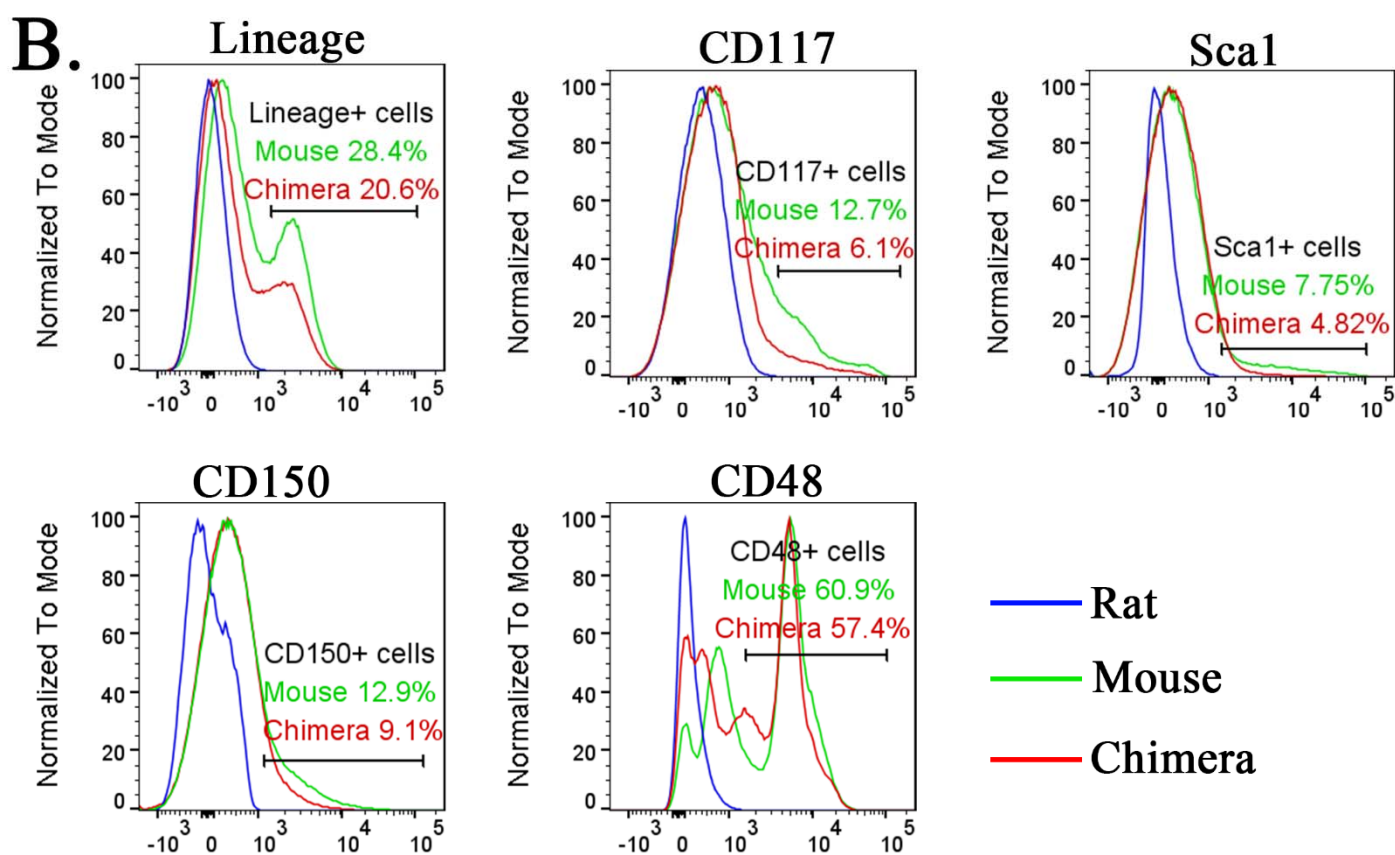

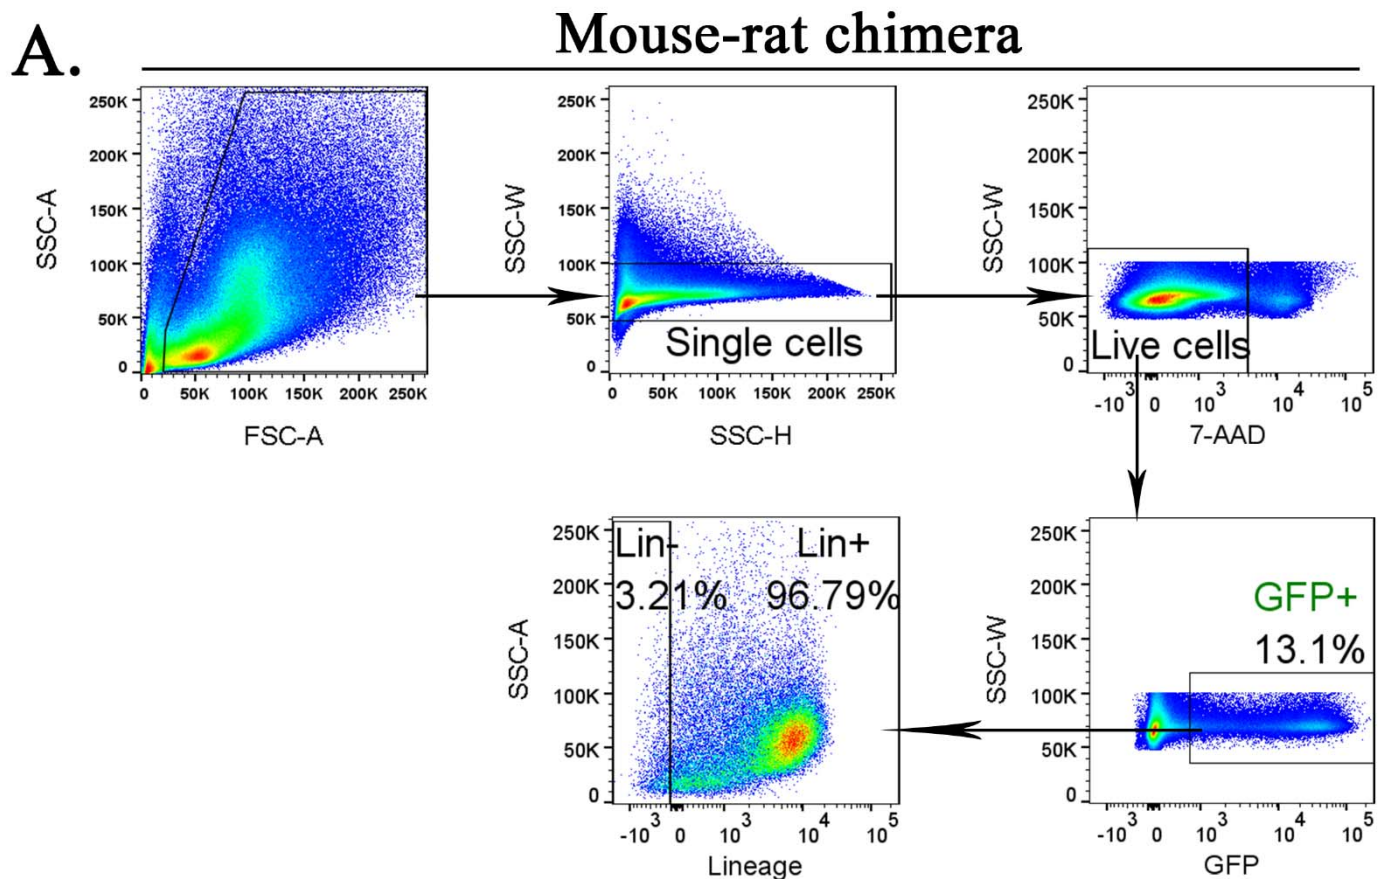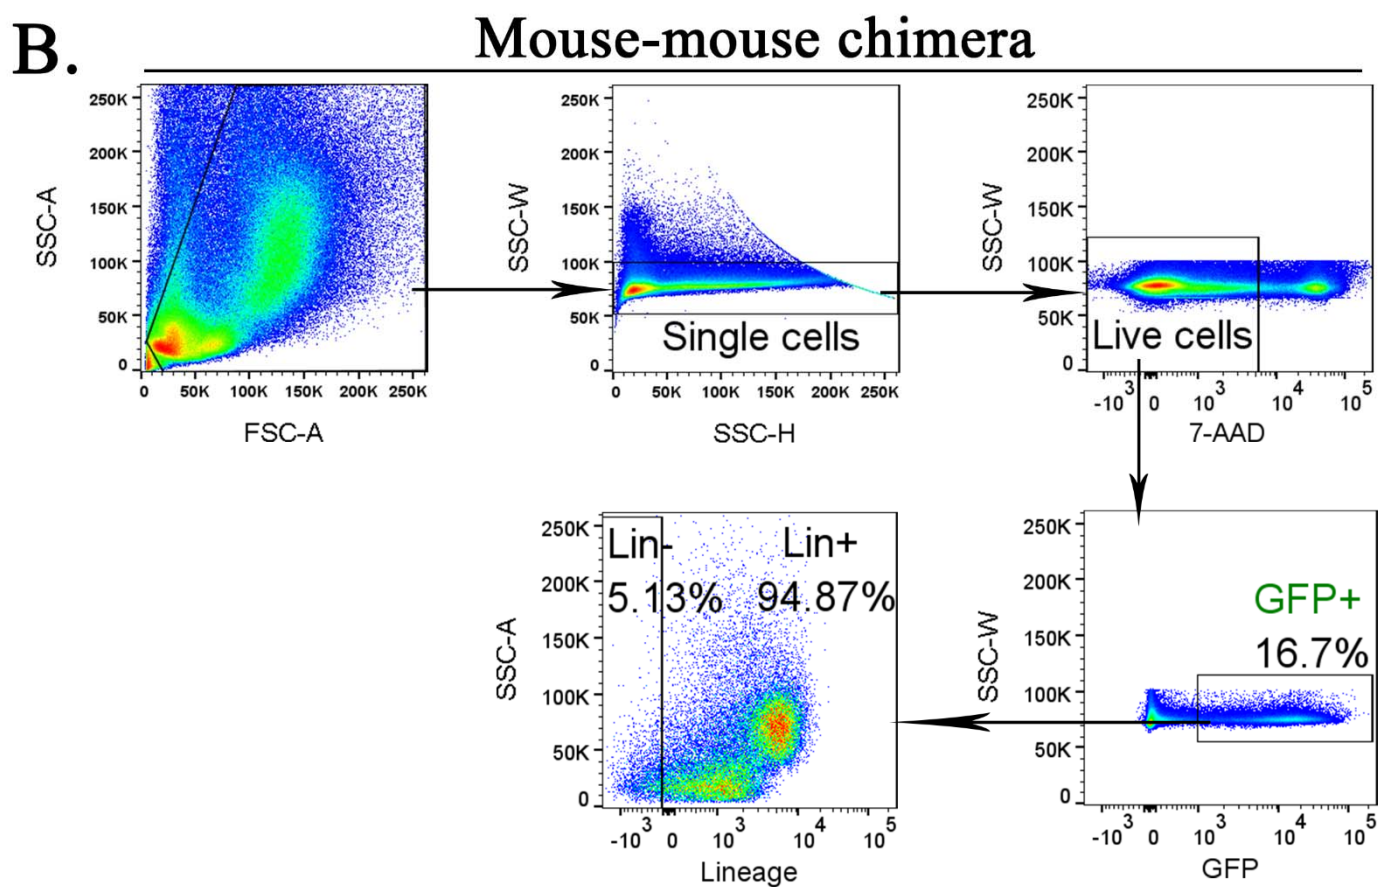

# Wen et al., Suppl.Fig.3

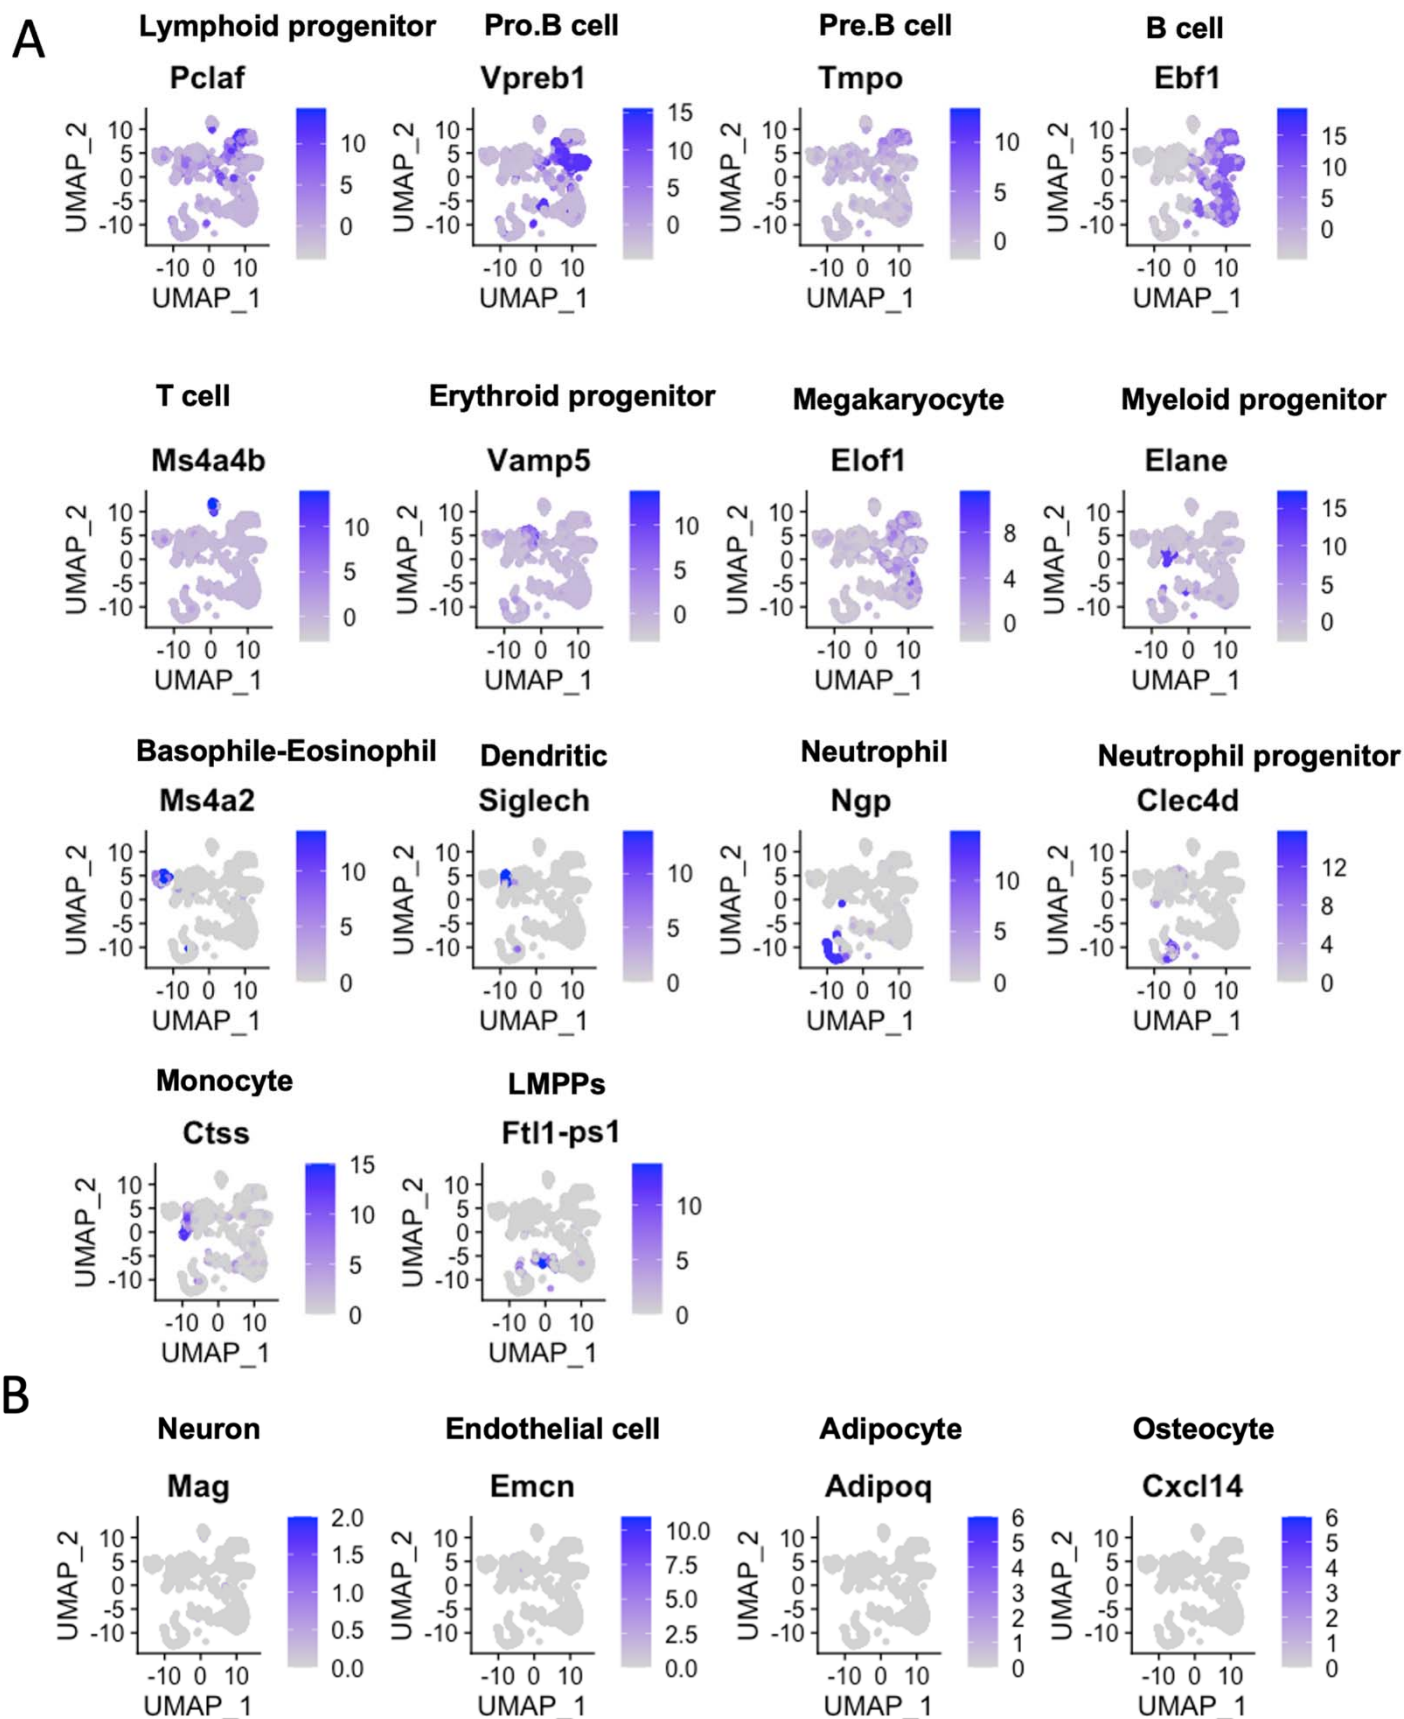

## Wen et al., Suppl.Fig.4

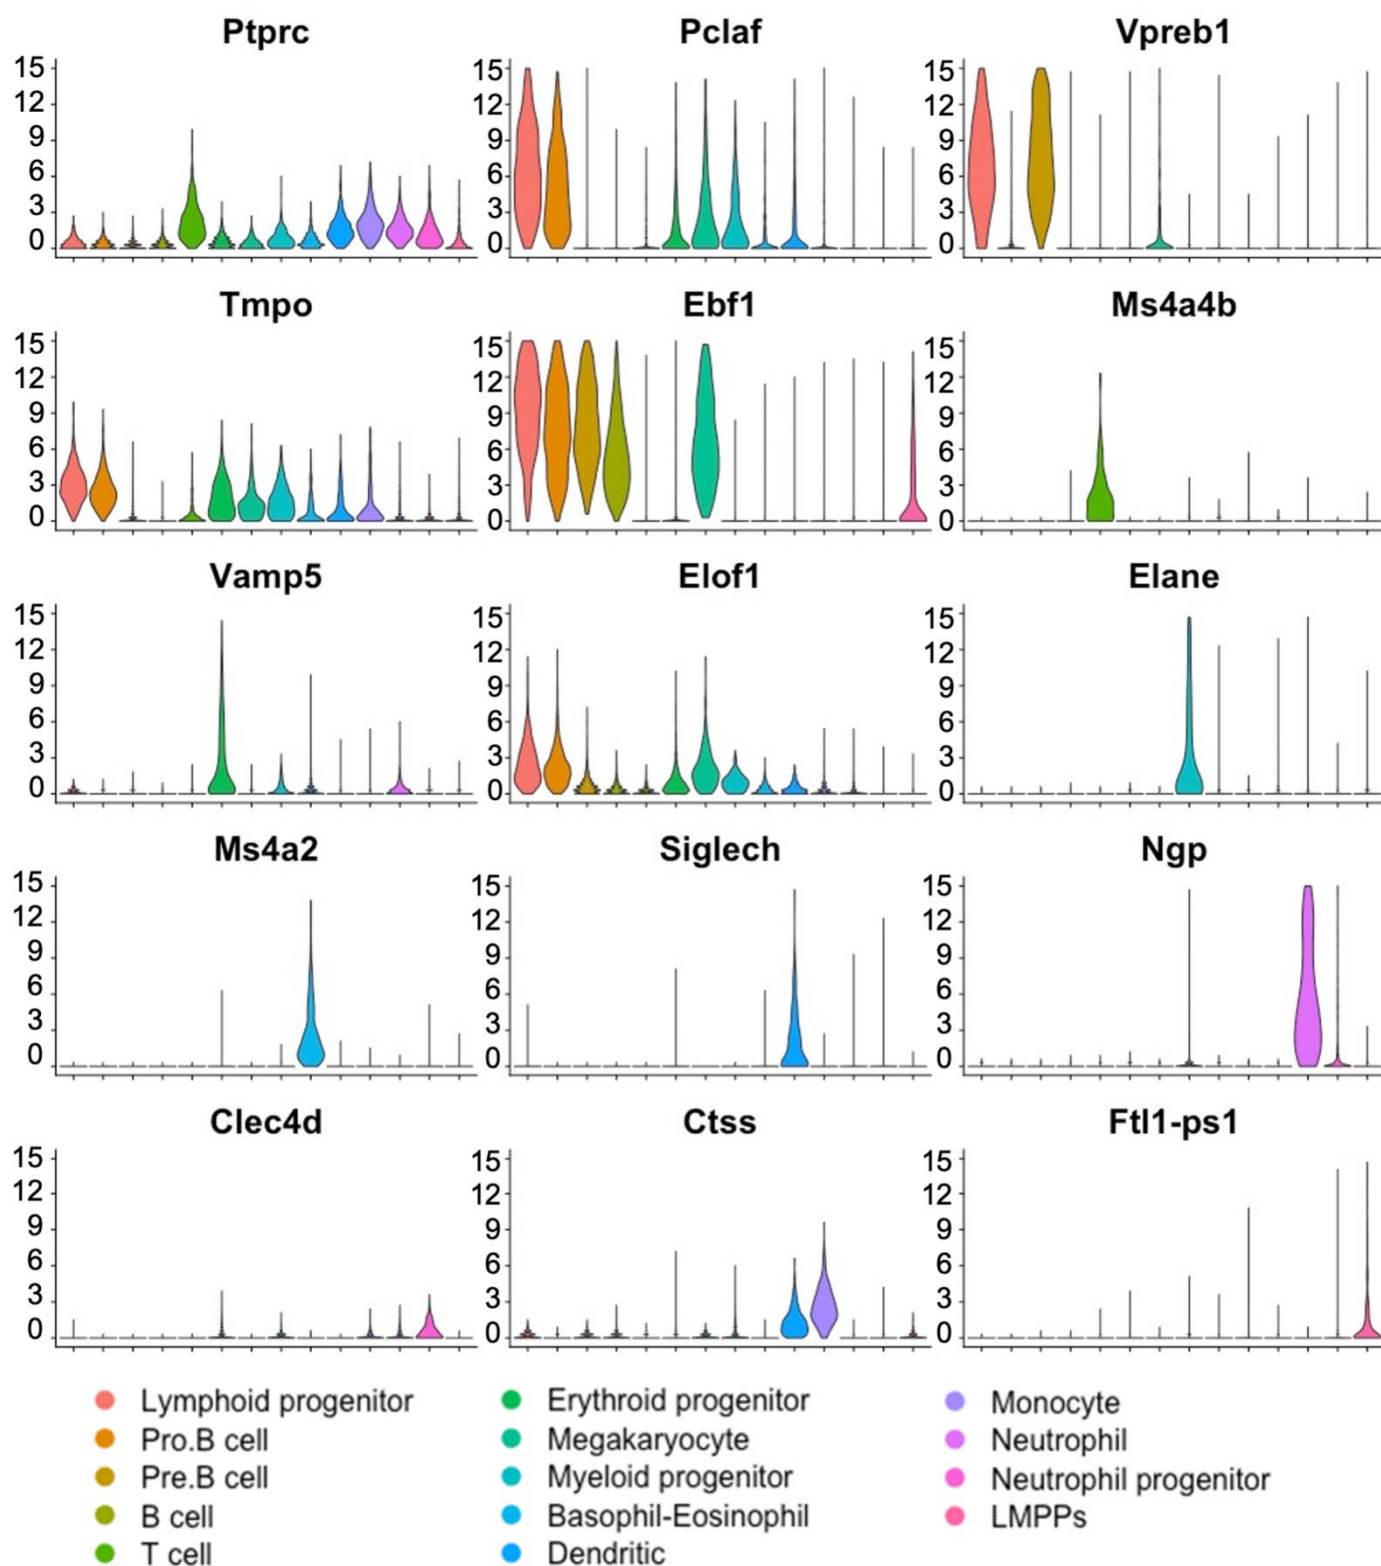

## Wen et al., Suppl.Fig.5

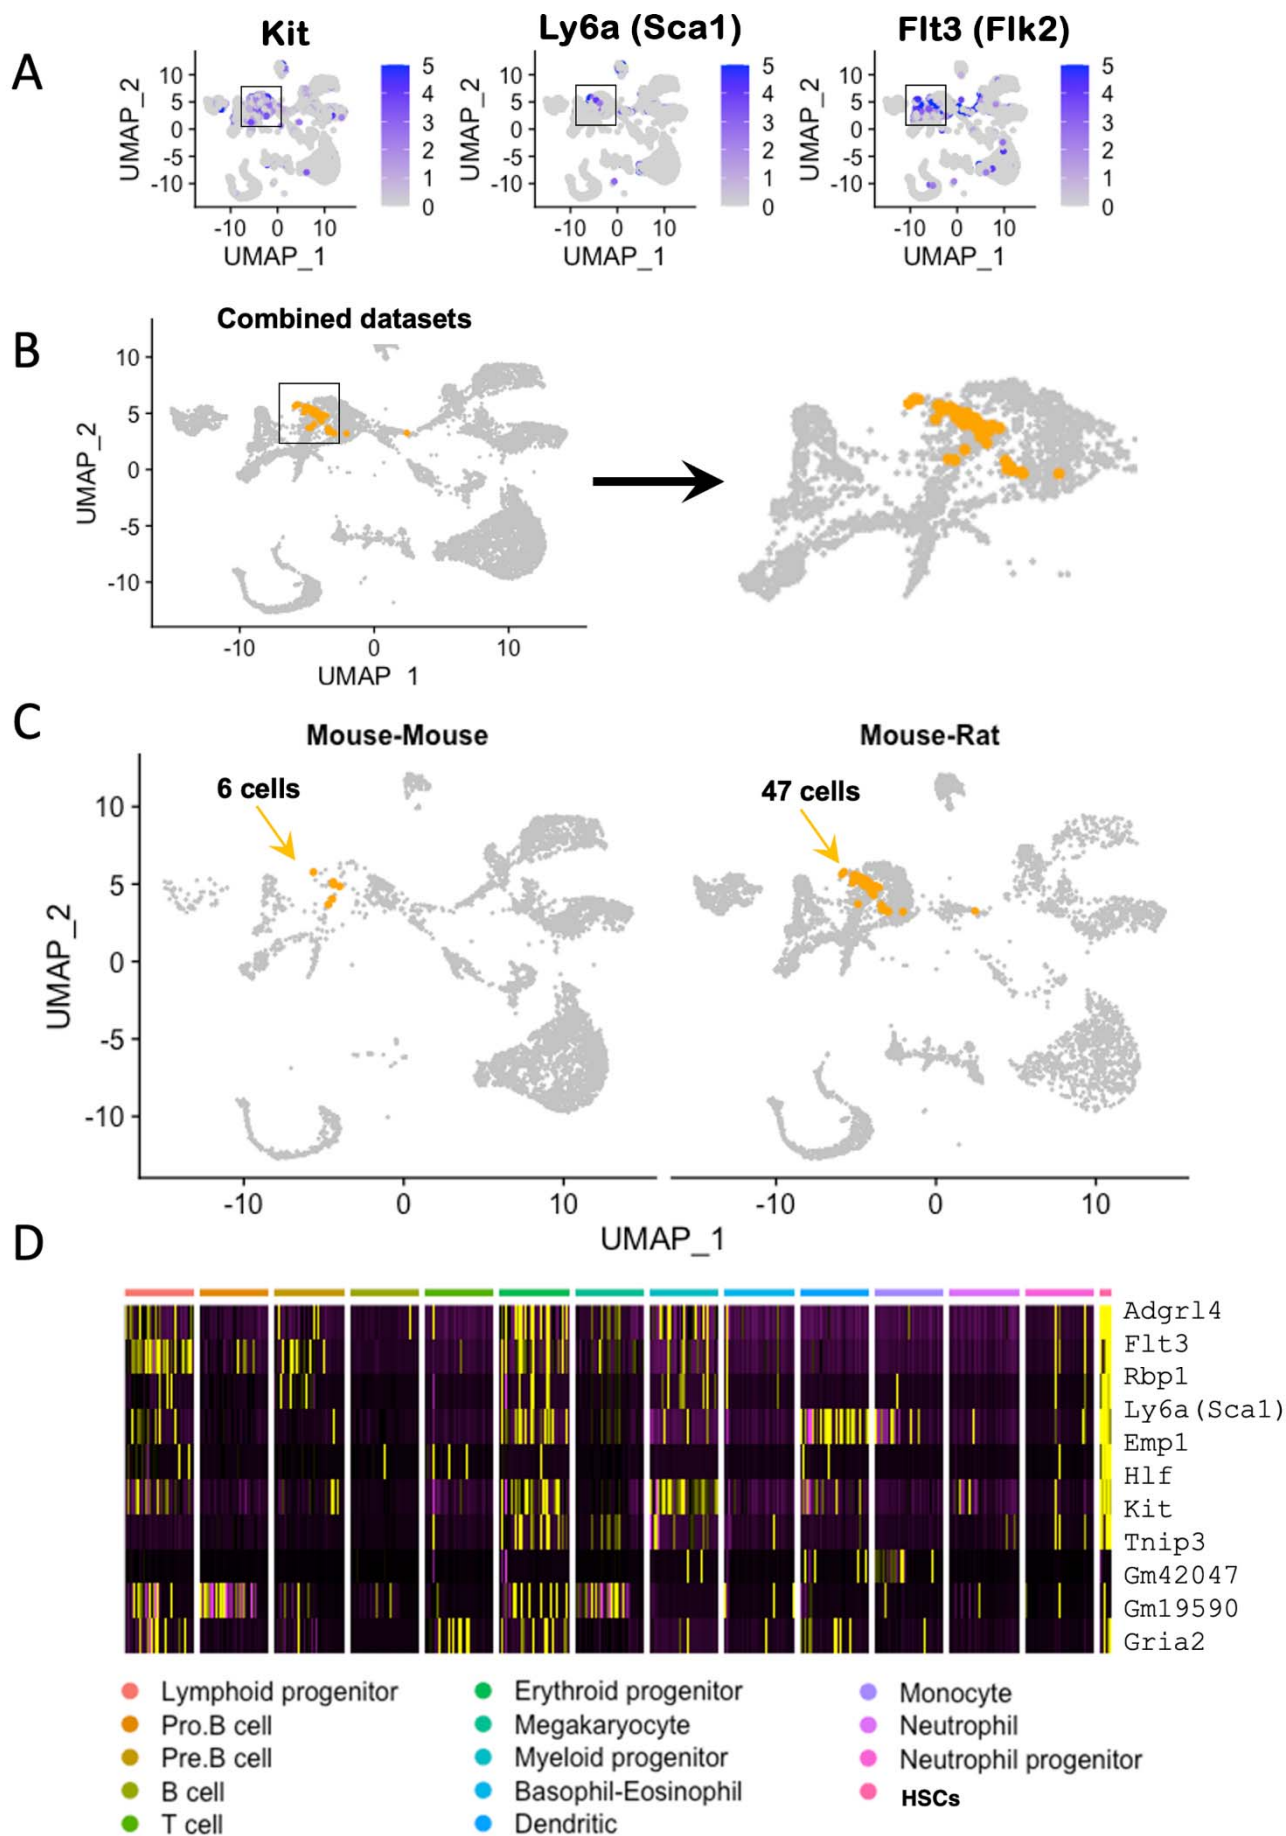

## Wen et al., Suppl.Fig.6

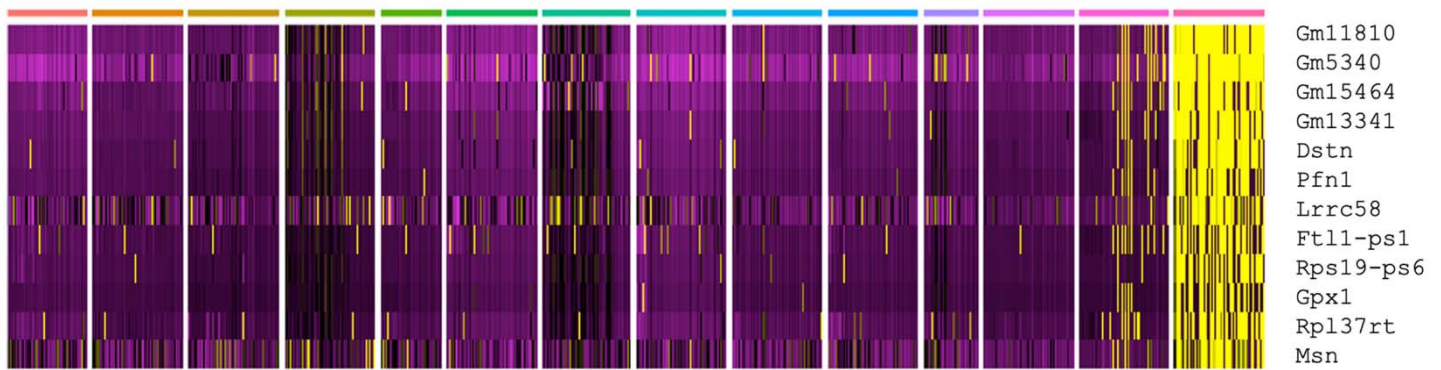

- |                       |                        |                         |
|-----------------------|------------------------|-------------------------|
| ● Lymphoid progenitor | ● Erythroid progenitor | ● Monocyte              |
| ● Pro.B cell          | ● Megakaryocyte        | ● Neutrophil            |
| ● Pre.B cell          | ● Myeloid progenitor   | ● Neutrophil progenitor |
| ● B cell              | ● Basophil-Eosinophil  | ● LMPPs                 |
| ● T cell              | ● Dendritic            |                         |

## Wen et al., Suppl.Fig.7

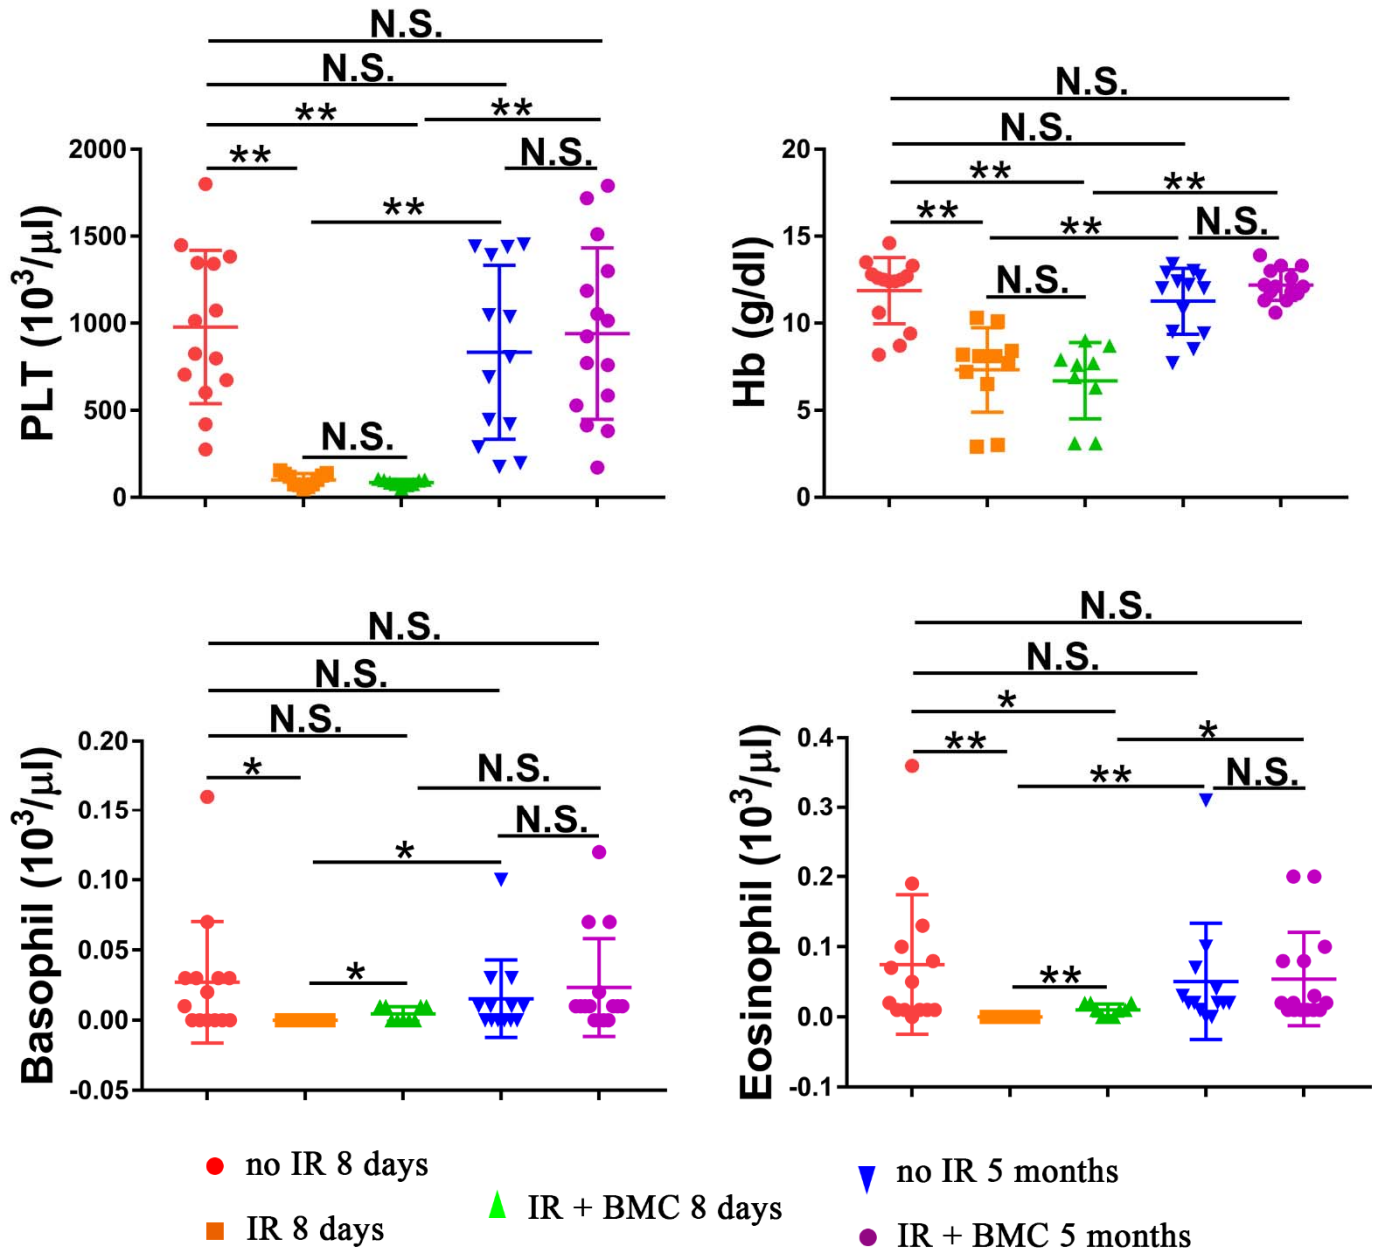



# Wen et al., Suppl.Fig.8

## A.

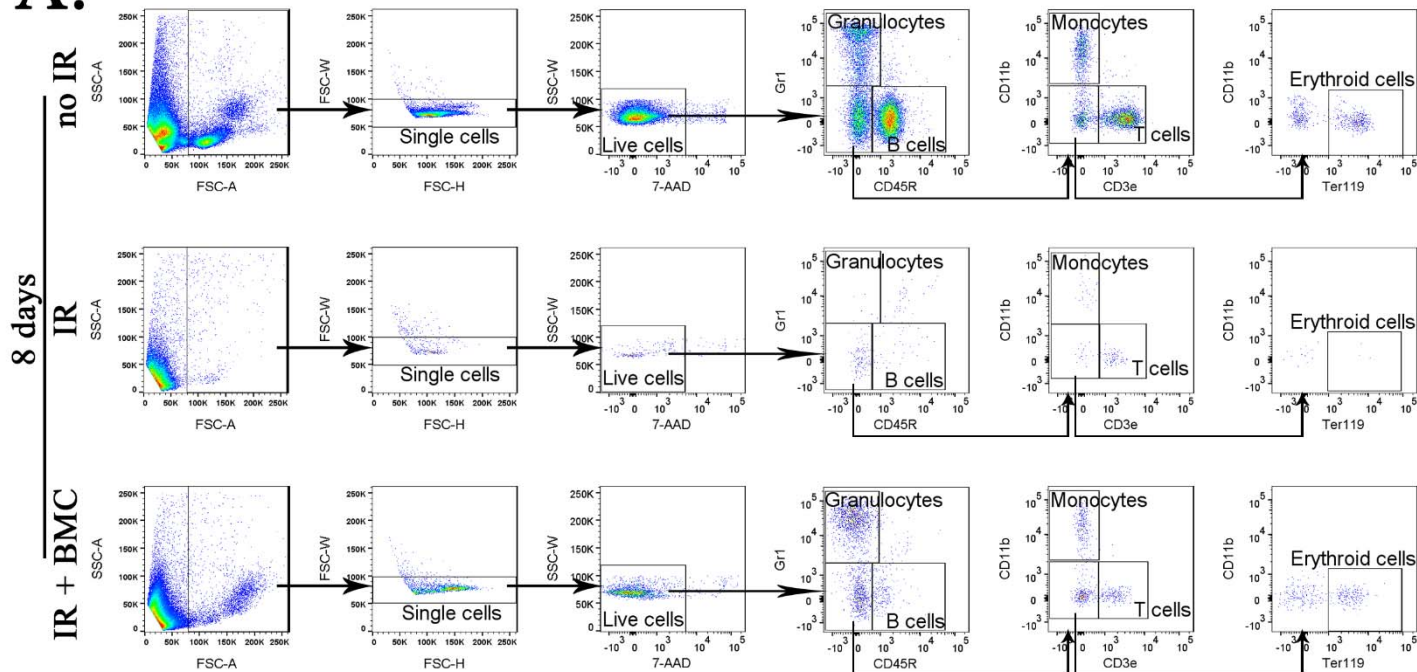

## B.

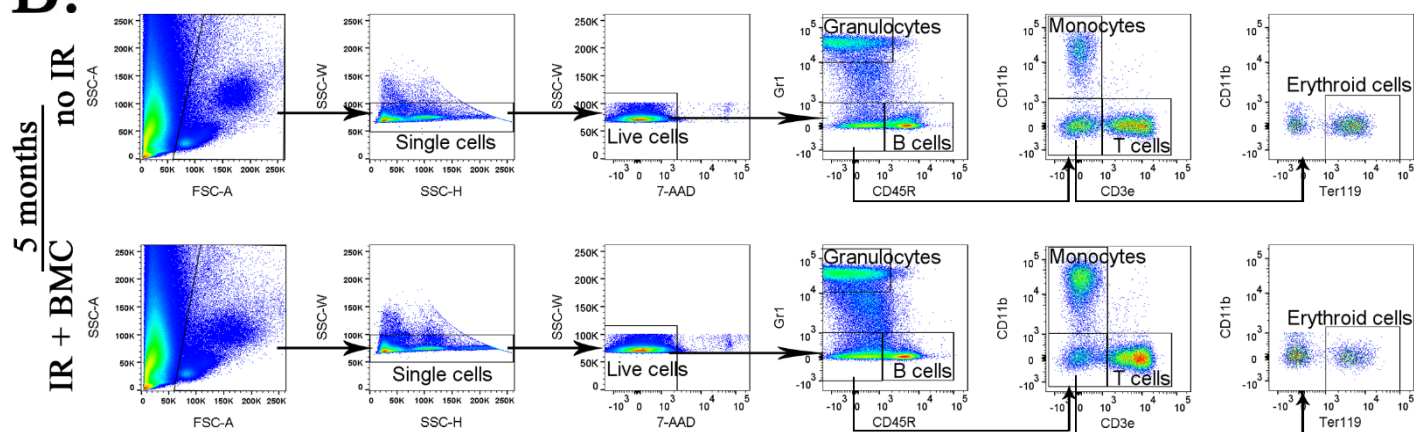

## Wen et al., Suppl.Fig.9

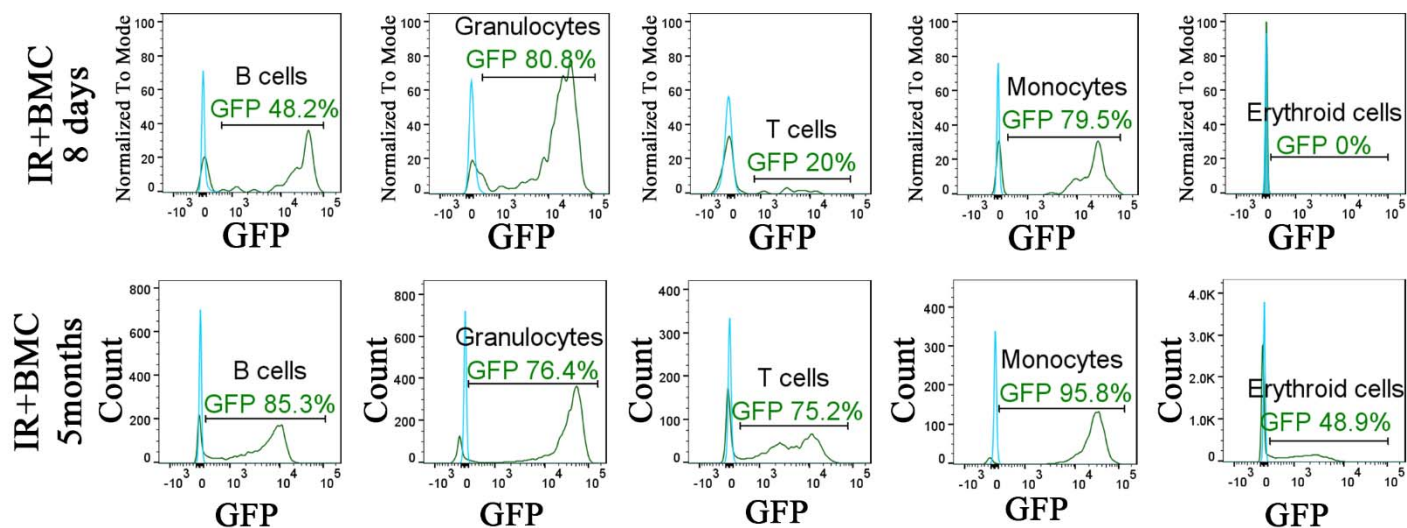

# Wen et al., Suppl.Fig.10

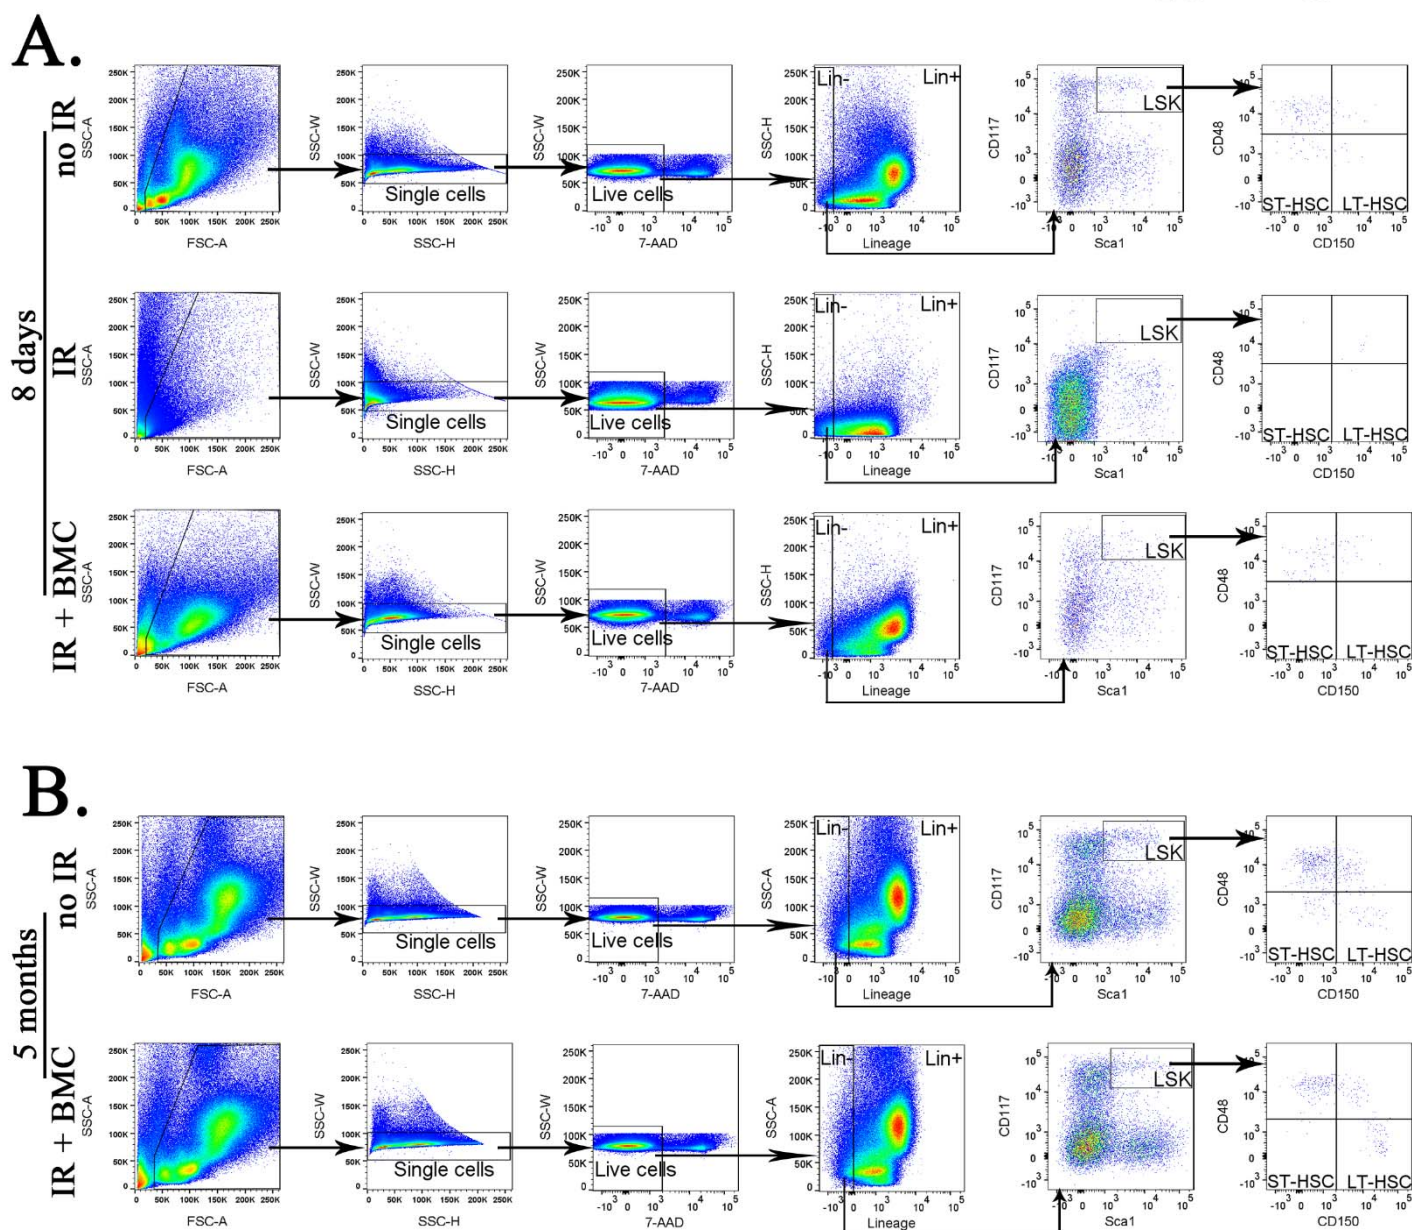

# Wen et al., Suppl.Fig.11

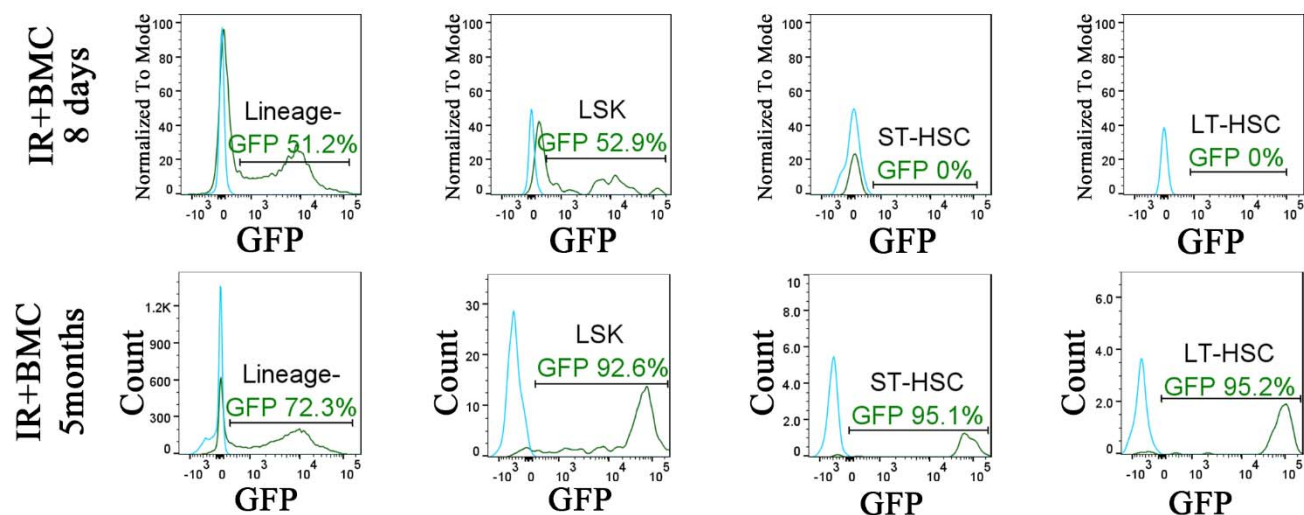

Source: https://www.biorxiv.org/content/10.1101/2021.09.30.462528v1.full.pdf
